# Supplementary material for: Trifluoromethylation of thiophenols and thiols with sodium trifluoromethanesulfinate and iodine pentoxide
Source: Royal Society of Chemistry journal article supplement (doi:10.1039/c5cy01561h), 2015-10-26

## Supporting Information

### Trifluoromethylation of Thiophenols and Thiols with Sodium Trifluoromethanesulfinate and Iodine Pentoxide

Jing-Jing Ma<sup>[a]</sup>, Wen-Bin Yi<sup>[a]\*</sup>, Guo-Ping Lu<sup>[a]</sup> and Chun Cai<sup>[a]</sup>

*School of Chemical Engineering, Nanjing University of Science and Technology, Xiao Ling*

*Wei Street, Nanjing 210094, People's Republic of China*

\*Corresponding author. Fax: +86-25-84315030; Tel.: +86-25-84315514; E-mail: [yiwenbin@mail.njust.edu.cn](mailto:yiwenbin@mail.njust.edu.cn)

|                                                              |            |
|--------------------------------------------------------------|------------|
| <b>1. General Information.....</b>                           | <b>S2</b>  |
| <b>2. Representative Procedures and Analytical Data.....</b> | <b>S2</b>  |
| <b>3. NMR Spectra.....</b>                                   | <b>S11</b> |

## 1. General Information

Unless otherwise mentioned, solvents and reagents were purchased from commercial sources and used without further purification.  $^1\text{H}$ ,  $^{19}\text{F}$  and  $^{13}\text{C}$  NMR spectra were recorded on a 500 MHz Bruker DRX 500 and tetramethylsilane (TMS) was used as a reference. Chemical shifts were reported in parts per million (ppm),  $^1\text{H}$  NMR chemical shifts were determined relative to internal  $(\text{CH}_3)_4\text{Si}$  (TMS) at  $\delta$  0.0 (sometimes may be two points) or to the signal of a residual protonated solvent:  $\text{CDCl}_3$   $\delta$  7.26 (due to the quality of  $\text{CDCl}_3$  the water peak may move to about 1.6 ppm).  $^{13}\text{C}$  NMR chemical shifts were determined relative to internal TMS at  $\delta$  0.0. Data for  $^1\text{H}$ ,  $^{13}\text{C}$  and  $^{19}\text{F}$  NMR are recorded as follows: chemical shift ( $\delta$ , ppm), multiplicity (s = singlet, d = doublet, t = triplet, m = multiplet, q = quartet, br = broad). GC-MS were performed on an ISQ Trace 1300 (electrospray ionization: EI).

## 2. Representative Procedures and Analytical Data

### 2.1 General procedure for the trifluoromethylation of thiols or thiophenols

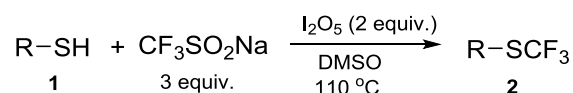

A reaction tube was charged with 4-Methyl-cinnamic acid (**1b**) (24.8 mg, 0.2 mmol) at room temperature, then trifluoromethanesulfinate (93.6 mg, 0.6 mmol) and iodine pentoxide (133.6 mg, 0.4 mmol), DMSO (2.0 mL) were added. The resulting mixture was stirred at 110 °C in this sealed tube equipped with a Teflon plug for 24 h. After cooling to room temperature, the reaction mixture was quenched and purified by flash silica gel column chromatography (eluent: hexane/EtOAc) to afford the desired product **2b** (34.2 mg, 89%).

### 2.2 Analytical data of compounds 2.

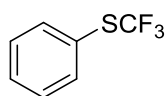

Chemical Formula:  $\text{C}_7\text{H}_5\text{F}_3\text{S}$   
Exact Mass: 178.02

Phenyl(trifluoromethyl)sulfane (**2a**): 26.3 mg, 74 % yield, colorless oil.  $^1\text{H}$  NMR (500 MHz,  $\text{CDCl}_3$ )  $\delta$  7.66 (d,  $J = 7.3$  Hz, 2H), 7.52–7.46 (m, 1H), 7.46–7.38 (m, 2H);  $^{19}\text{F}$  NMR (470 MHz,  $\text{CDCl}_3$ )  $\delta$  -42.77 (s); GC-MS (EI) Calcd. for  $\text{C}_7\text{H}_5\text{F}_3\text{S}$  178.01, found 178.02.

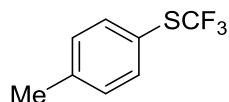

Chemical Formula:  $\text{C}_8\text{H}_7\text{F}_3\text{S}$   
Exact Mass: 192.02

(4-methylphenyl)(trifluoromethyl)sulfane (**2b**): 34.2 mg, 89% yield, colorless oil.  $^1\text{H}$  NMR (500 MHz,  $\text{CDCl}_3$ )  $\delta$  7.54 (d,  $J = 7.9$  Hz, 2H), 7.23 (d,  $J = 7.8$  Hz, 2H), 2.39 (s, 3H);  $^{13}\text{C}$  NMR (126 MHz,  $\text{CDCl}_3$ )  $\delta$  141.42 (s), 136.42 (s), 133.19 (q,  $J = 308.7$ ), 130.28 (s), 120.90 (s), 21.32 (s);  $^{19}\text{F}$  NMR (470 MHz,  $\text{CDCl}_3$ )  $\delta$  -43.22 (s). GC-MS (EI) Calcd. for  $\text{C}_8\text{H}_7\text{F}_3\text{S}$  192.02, found 192.02.

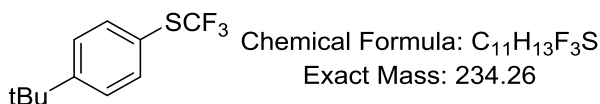

(4-*tert*-butylphenyl)(trifluoromethyl)sulfane (**2c**)<sup>1</sup>: 39.3 mg, 84% yield, colorless oil. <sup>1</sup>H NMR (500 MHz, CDCl<sub>3</sub>) δ 7.58 (d, *J* = 8.4 Hz, 2H), 7.47–7.40 (m, 2H), 1.33 (s, 9H); <sup>19</sup>F NMR (470 MHz, CDCl<sub>3</sub>) δ -42.99 (s). GC-MS (EI) Calcd. for C<sub>11</sub>H<sub>13</sub>F<sub>3</sub>S 234.07, found 234.26.

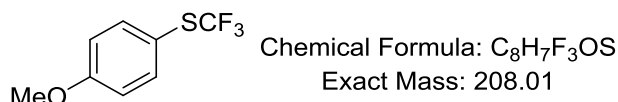

(4-methoxyphenyl)(trifluoromethyl)sulfane (**2d**)<sup>1</sup>: 37.8 mg, 91% yield, yellow oil. <sup>1</sup>H NMR (500 MHz, CDCl<sub>3</sub>) δ 7.58 (t, *J* = 5.8 Hz, 2H), 7.03 – 6.82 (m, 2H), 3.84 (s, 3H); <sup>13</sup>C NMR (126 MHz, CDCl<sub>3</sub>) <sup>13</sup>C NMR (126 MHz, CDCl<sub>3</sub>) δ 133.39, 130.94, 128.49, 126.04; δ 161.95 (s), 138.39 (s), 133.40 (q, *J* = 308.7), 115.02 (s), 55.52 (s); <sup>19</sup>F NMR (470 MHz, CDCl<sub>3</sub>) δ -43.94 (s). GC-MS (EI) Calcd. for C<sub>8</sub>H<sub>7</sub>F<sub>3</sub>OS 208.02, found 208.01.

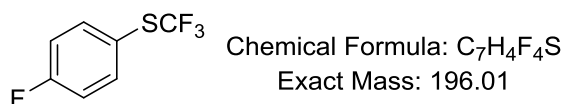

(4-fluorophenyl)(trifluoromethyl)sulfane (**2e**)<sup>2</sup>: 29.8 mg, 76% yield, colorless oil. <sup>1</sup>H NMR (500 MHz, CDCl<sub>3</sub>) δ 7.70 – 7.61 (m, 2H), 7.16 – 7.09 (m, 2H); <sup>13</sup>C NMR (126 MHz, CDCl<sub>3</sub>) δ 165.51 (d, *J* = 252.0), 138.76 (s), 138.69 (s), 130.61 (q, *J* = 302.4), 116.89(s), 116.71(s); <sup>19</sup>F NMR (470 MHz, CDCl<sub>3</sub>) δ -43.37 (s), -108.66 (s). GC-MS (EI) Calcd. for C<sub>7</sub>H<sub>4</sub>F<sub>4</sub>S 196.00, found 196.01.

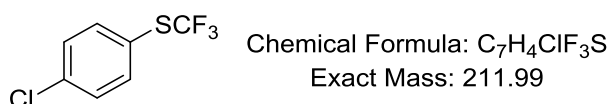

(4-chlorophenyl)(trifluoromethyl)sulfane (**2f**)<sup>1</sup>: 34.6 mg, 82%, colorless oil. <sup>1</sup>H NMR (500 MHz, CDCl<sub>3</sub>) δ 7.59 (d, *J* = 8.4 Hz, 2H), 7.41 (d, *J* = 8.5 Hz, 2H); <sup>13</sup>C NMR (126 MHz, CDCl<sub>3</sub>) δ 137.71 (s), 137.60 (s), 130.55 (q, *J* = 308.7), 129.82 (s), 122.80 (s), 122.78 (s); <sup>19</sup>F NMR (470 MHz, CDCl<sub>3</sub>) δ -42.85 (s). GC-MS (EI) Calcd. for C<sub>7</sub>H<sub>4</sub>ClF<sub>3</sub>S 211.97, found 211.99.

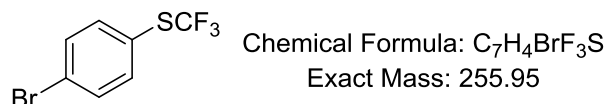

(4-bromophenyl)(trifluoromethyl)sulfane (**2g**)<sup>3</sup>: 44.5 mg, 87%, yellow oil. <sup>1</sup>H NMR (500 MHz, CDCl<sub>3</sub>) δ 7.60 – 7.54 (m, 2H), 7.52 (d, *J* = 8.5 Hz, 2H); <sup>13</sup>C NMR (126 MHz, CDCl<sub>3</sub>) δ 137.75, 132.90 (q, *J* = 308.7 Hz), 132.81, 126.02, 123.44, 123.42; <sup>19</sup>F NMR (470 MHz, CDCl<sub>3</sub>) δ -42.74 (s). GC-MS (EI) Calcd. for C<sub>7</sub>H<sub>4</sub>BrF<sub>3</sub>S 255.92, found 255.95.

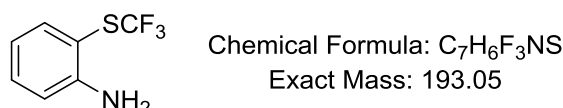

2-(trifluoromethylthio)aniline (**2h**)<sup>4</sup>: 22.8 mg, 59%, brown oil. <sup>1</sup>H NMR (500 MHz, CDCl<sub>3</sub>) δ 7.47 (d, *J* = 7.8 Hz, 1H), 7.31 – 7.26 (m, 1H), 6.80 (d, *J* = 8.1 Hz, 1H), 6.77 – 6.71 (m, 1H); <sup>19</sup>F NMR (470 MHz, CDCl<sub>3</sub>) δ -42.78 (s). GC-MS (EI) Calcd. for C<sub>7</sub>H<sub>6</sub>F<sub>3</sub>NS 193.02, found 193.05.

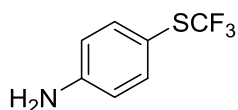

Chemical Formula: C<sub>7</sub>H<sub>6</sub>F<sub>3</sub>NS  
Exact Mass: 193.08

4-((trifluoromethyl)thio)aniline (**2i**)<sup>8</sup>: 29.3 mg, 76%, brown oil. <sup>1</sup>H NMR (500 MHz, CDCl<sub>3</sub>) δ 7.34 (d, *J* = 8.4 Hz, 2H), 6.67-6.52 (m, 2H); <sup>19</sup>F NMR (470 MHz, CDCl<sub>3</sub>) δ -44.44. GC-MS (EI) Calcd. for C<sub>7</sub>H<sub>6</sub>F<sub>3</sub>NS 193.05, found 193.08.

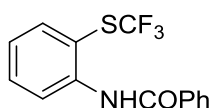

Chemical Formula: C<sub>14</sub>H<sub>10</sub>F<sub>3</sub>NOS  
Exact Mass: 297.13

*N*-(2-((trifluoromethyl)thio)phenyl)benzamide (**2j**): 89%, 52.8 mg, yellow powder. <sup>1</sup>H NMR (500 MHz, CDCl<sub>3</sub>) δ 8.97 (s, 1H), 8.62 (d, *J* = 8.4 Hz, 1H), 7.90-7.80 (m, 2H), 7.68-7.59 (m, 1H), 7.55-7.48 (m, 2H), 7.45 (t, *J* = 7.5 Hz, 2H), 7.10 (t, *J* = 7.6 Hz, 1H); <sup>13</sup>C NMR (126 MHz, CDCl<sub>3</sub>) δ 165.37 (s), 141.62 (s), 138.91 (s), 134.63 (s), 133.59 (s), 132.42 (s), 130 (q, *J* = 308.8), 129.16 (s), 127.15 (s), 124.72 (s), 121.31 (s), 112.04 (s); <sup>19</sup>F NMR (470 MHz, CDCl<sub>3</sub>) δ -42.29. GC-MS (EI) Calcd. for C<sub>14</sub>H<sub>10</sub>F<sub>3</sub>NOS 297.04, found 297.13.

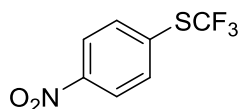

Chemical Formula: C<sub>7</sub>H<sub>4</sub>F<sub>3</sub>NO<sub>2</sub>S  
Exact Mass: 223.03

(4-nitrophenyl)(trifluoromethyl)sulfane (**2k**)<sup>5</sup>: 39.2 mg, 88%, yellow oil. <sup>1</sup>H NMR (500 MHz, CDCl<sub>3</sub>) δ 8.28 (d, *J* = 8.8 Hz, 2H), 7.83 (d, *J* = 8.7 Hz, 2H); <sup>13</sup>C NMR (126 MHz, CDCl<sub>3</sub>) δ 149.16 (s), 136.10 (s), 132.57 (q, *J* = 300.0), 124.37 (s); <sup>19</sup>F NMR (470 MHz, CDCl<sub>3</sub>) δ -41.31 (s). GC-MS (EI) Calcd. for C<sub>7</sub>H<sub>4</sub>F<sub>3</sub>NO<sub>2</sub>S 222.09, found 223.03.

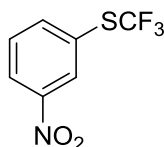

Chemical Formula: C<sub>7</sub>H<sub>4</sub>F<sub>3</sub>NO<sub>2</sub>S  
Exact Mass: 222.98

(*E*)-1-bromo-4-(3,3,3-trifluoroprop-1-en-1-yl)benzene (**2l**)<sup>5</sup>: 36.6 mg, 82%, yellow oil. <sup>1</sup>H NMR (500 MHz, CDCl<sub>3</sub>) δ 8.55 (t, *J* = 1.9 Hz, 1H), 8.38 (ddd, *J* = 8.3, 2.2, 1.0 Hz, 1H), 8.01 (d, *J* = 7.8 Hz, 1H), 7.67 (t, *J* = 8.0 Hz, 1H); <sup>13</sup>C NMR (126 MHz, CDCl<sub>3</sub>) δ 148.60 (s), 141.74 (s), 132.74 (q, *J* = 313.7), 130.79 (s), 130.44 (s), 126.78 (s), 125.74 (s); <sup>19</sup>F NMR (470 MHz, CDCl<sub>3</sub>) δ -42.03 (s). GC-MS (EI) Calcd. for C<sub>7</sub>H<sub>4</sub>F<sub>3</sub>NO<sub>2</sub>S 222.99, found 222.98.

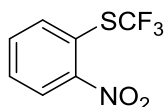

Chemical Formula: C<sub>7</sub>H<sub>4</sub>F<sub>3</sub>NO<sub>2</sub>S  
Exact Mass: 223.00

(2-nitrophenyl)(trifluoromethyl)sulfane (**2m**)<sup>5</sup>: 29.9 mg, 67%, yellow oil. <sup>1</sup>H NMR (500 MHz, CDCl<sub>3</sub>) δ 8.12 (dd, *J* = 8.2, 1.3 Hz, 1H), 7.84 (d, *J* = 8.1 Hz, 1H), 7.67 (td, *J* = 7.9, 1.4 Hz, 1H),

7.59–7.52 (m, 1H);  $^{19}\text{F}$  NMR (470 MHz,  $\text{CDCl}_3$ )  $\delta$  -41.21 (s). GC-MS (EI) Calcd. for  $\text{C}_7\text{H}_4\text{F}_3\text{NO}_2\text{S}$  222.99, found 223.00.

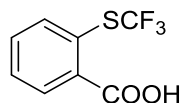

Chemical Formula:  $\text{C}_8\text{H}_5\text{F}_3\text{O}_2\text{S}$   
Exact Mass: 222.00

2-(trifluoromethylthio)benzoic acid (**2n**)<sup>4</sup>: 34.6 mg, 78%, yellow oil.  $^1\text{H}$  NMR (500 MHz,  $\text{CDCl}_3$ )  $\delta$  8.12 (d,  $J = 6.9$  Hz, 1H), 7.77 (d,  $J = 8.0$  Hz, 1H), 7.66–7.55 (m, 1H), 7.48 (t,  $J = 7.5$  Hz, 1H);  $^{13}\text{C}$  NMR (126 MHz,  $\text{CDCl}_3$ )  $\delta$  171.45 (s), 134.13 (q,  $J = 297.4$ ), 133.63 (s), 132.17 (s), 132.02 (s), 130.36 (s), 130.19 (s), 128.49 (s);  $^{19}\text{F}$  NMR (470 MHz,  $\text{CDCl}_3$ )  $\delta$  -42.20 (s). GC-MS (EI) Calcd. for  $\text{C}_8\text{H}_5\text{F}_3\text{O}_2\text{S}$  222.00, found 222.00.

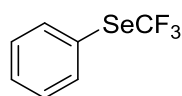

Chemical Formula:  $\text{C}_7\text{H}_5\text{F}_3\text{Se}$   
Exact Mass: 225.94

(*E*)-1-nitro-4-(3,3,3-trifluoroprop-1-en-1-yl)benzene (**2o**)<sup>9</sup>: 33.3 mg, 74%, yellow solid.  $^1\text{H}$  NMR (500 MHz,  $\text{CDCl}_3$ )  $\delta$  7.75 (d,  $J = 7.3$  Hz, 2H), 7.47 (t,  $J = 7.4$  Hz, 1H), 7.40 (t,  $J = 7.5$  Hz, 2H);  $^{19}\text{F}$  NMR (470 MHz,  $\text{CDCl}_3$ )  $\delta$  -36.11 (s). GC-MS (EI) Calcd. for  $\text{C}_7\text{H}_5\text{F}_3\text{Se}$  225.95, found 225.94.

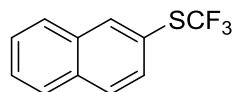

Chemical Formula:  $\text{C}_{11}\text{H}_7\text{F}_3\text{S}$   
Exact Mass: 228.03

Naphthalen-2-yl(trifluoromethyl)sulfane (**2p**)<sup>2</sup>: 37.8 mg, 83%, yellow oil.  $^1\text{H}$  NMR (500 MHz,  $\text{CDCl}_3$ )  $\delta$  8.21 (s, 1H), 7.88 (d,  $J = 8.2$  Hz, 3H), 7.67 (d,  $J = 8.5$  Hz, 1H), 7.63–7.51 (m, 2H);  $^{13}\text{C}$  NMR (126 MHz,  $\text{CDCl}_3$ )  $\delta$  137.14 (s), 133.97 (s), 133.47 (s), 132.80 (q,  $J = 308.4$ ), 131.92 (s), 129.32 (s), 128.29 (s), 128.04 (s), 127.89 (s), 127.11 (s), 121.61 (s);  $^{19}\text{F}$  NMR (470 MHz,  $\text{CDCl}_3$ )  $\delta$  -42.49 (s). GC-MS (EI) Calcd. for  $\text{C}_{11}\text{H}_7\text{F}_3\text{S}$  228.02, found 228.03.

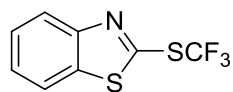

Chemical Formula:  $\text{C}_8\text{H}_4\text{F}_3\text{NS}_2$   
Exact Mass: 235.01

2-(trifluoromethylthio)benzo[d]thiazole (**2q**)<sup>6</sup>: 38.0 mg, 81%, brown solid.  $^1\text{H}$  NMR (500 MHz,  $\text{CDCl}_3$ )  $\delta$  8.14 (d,  $J = 8.2$  Hz, 1H), 7.90 (d,  $J = 8.0$  Hz, 1H), 7.61–7.53 (m, 1H), 7.53–7.44 (m, 1H);  $^{13}\text{C}$  NMR (126 MHz,  $\text{CDCl}_3$ )  $\delta$  166.63 (s), 153.10 (s), 151.74 (s), 137.89 (s), 134.05 (q,  $J = 312.5$ ), 126.99 (s), 126.69 (s), 124.14 (s), 121.31 (s);  $^{19}\text{F}$  NMR (470 MHz,  $\text{CDCl}_3$ )  $\delta$  -40.17 (d,  $J = 5.6$  Hz). GC-MS (EI) Calcd. for  $\text{C}_8\text{H}_4\text{F}_3\text{NS}_2$  234.97, found 235.01.

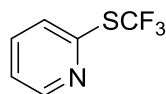

Chemical Formula:  $\text{C}_6\text{H}_4\text{F}_3\text{NS}$   
Exact Mass: 179.07

2-((trifluoromethyl)thio)pyridine (**2r**)<sup>4</sup>: 30.8 mg, 86%, red oil.  $^1\text{H}$  NMR (500 MHz,  $\text{CDCl}_3$ )  $\delta$  8.62 (dd,  $J = 5.0, 1.9$  Hz, 1H), 7.74 (td,  $J = 7.7, 2.0$  Hz, 1H), 7.60 (d,  $J = 7.9$  Hz, 1H), 7.33 (ddd,  $J = 7.6, 4.8, 1.1$  Hz, 1H);  $^{13}\text{C}$  NMR (126 MHz,  $\text{CDCl}_3$ )  $\delta$  150.65 (s), 149.26 (s), 137.83 (s), 136.42 (q,

$J = 308.7$ ), 128.26 (s), 123.95 (s);  $^{19}\text{F}$  NMR (470 MHz,  $\text{CDCl}_3$ )  $\delta$  -40.38. GC-MS (EI) Calcd. for  $\text{C}_6\text{H}_4\text{F}_3\text{NS}$  179.00, found 179.07.

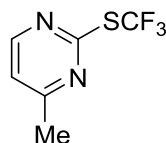

Chemical Formula:  $\text{C}_6\text{H}_5\text{F}_3\text{N}_2\text{S}$   
Exact Mass: 194.06

4-methyl-2-((trifluoromethyl)thio)pyrimidine (**2s**): 28.7 mg, 74%, red oil.  $^1\text{H}$  NMR (500 MHz,  $\text{CDCl}_3$ )  $\delta$  8.47 (s, 1H), 7.42 – 6.73 (m, 1H), 2.51 (s, 3H);  $^{13}\text{C}$  NMR (126 MHz,  $\text{CDCl}_3$ )  $\delta$  168.97 (s), 165.23 (s), 157.48 (s), 132.12 (q,  $J = 307.4$ ), 118.74 (s), 24.05 (s);  $^{19}\text{F}$  NMR (470 MHz,  $\text{CDCl}_3$ )  $\delta$  -40.97. GC-MS (EI) Calcd. for  $\text{C}_6\text{H}_5\text{F}_3\text{N}_2\text{S}$  194.01, found 194.06.

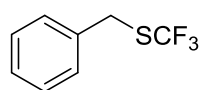

Chemical Formula:  $\text{C}_8\text{H}_7\text{F}_3\text{S}$   
Exact Mass: 192.04

Benzyl(trifluoromethyl)sulfane (**2t**)<sup>7</sup>: 32.2 mg, 84%, colorless oil.  $^1\text{H}$  NMR (500 MHz,  $\text{CDCl}_3$ )  $\delta$  7.39 – 7.28 (m, 5H), 4.12 (s, 2H);  $^{13}\text{C}$  NMR (126 MHz,  $\text{CDCl}_3$ )  $\delta$  135.10 (s), 131.92 (q,  $J = 307.4$ ), 129.00 (s), 128.94 (s), 128.10 (s), 34.37 (s);  $^{19}\text{F}$  NMR (470 MHz,  $\text{CDCl}_3$ )  $\delta$  -41.66 (s). GC-MS (EI) Calcd. for  $\text{C}_8\text{H}_7\text{F}_3\text{S}$  192.02, found 192.04.

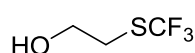

Chemical Formula:  $\text{C}_3\text{H}_5\text{F}_3\text{OS}$   
Exact Mass: 146.06

2-(trifluoromethylthio)ethanol (**2u**)<sup>10</sup>: 28.0 mg, 96%, colorless oil.  $^1\text{H}$  NMR (500 MHz,  $\text{CDCl}_3$ )  $\delta$  3.86 (t,  $J = 6.1$  Hz, 2H), 3.06 (t,  $J = 6.1$  Hz, 2H), 2.22 (s, 1H);  $^{13}\text{C}$  NMR (126 MHz,  $\text{CDCl}_3$ )  $\delta$  135.45 (q,  $J = 306.2$ ), 61.13 (s), 32.77 (s);  $^{19}\text{F}$  NMR (470 MHz,  $\text{CDCl}_3$ )  $\delta$  -40.83 (s). GC-MS (EI) Calcd. for  $\text{C}_3\text{H}_5\text{F}_3\text{OS}$  146.00, found 146.06.

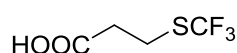

Chemical Formula:  $\text{C}_4\text{H}_5\text{F}_3\text{O}_2\text{S}$   
Exact Mass: 174.01

3-(trifluoromethylthio)propanoic acid (**2v**)<sup>4</sup>: 34.4 mg, 99%, yellow solid.  $^1\text{H}$  NMR (500 MHz,  $\text{CDCl}_3$ )  $\delta$  9.71 (s, 1H), 3.11 (t,  $J = 7.0$  Hz, 2H), 2.81 (t,  $J = 7.0$  Hz, 2H);  $^{13}\text{C}$  NMR (126 MHz,  $\text{CDCl}_3$ )  $\delta$  177.17 (s), 134.66 (q,  $J = 306.2$ ), 34.68 (s), 24.34 (s);  $^{19}\text{F}$  NMR (470 MHz,  $\text{CDCl}_3$ )  $\delta$  -41.59 (s). GC-MS (EI) Calcd. for  $\text{C}_4\text{H}_5\text{F}_3\text{O}_2\text{S}$  174.00, found 174.01.

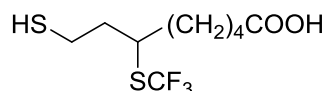

Chemical Formula:  $\text{C}_9\text{H}_{15}\text{F}_3\text{O}_2\text{S}_2$   
Exact Mass: 276.02

8-mercapto-6-(trifluoromethylthio)octanoic acid (**2w**): 51.9 mg, 94%, yellow solid.  $^1\text{H}$  NMR (500 MHz,  $\text{CDCl}_3$ )  $\delta$  9.91 (d,  $J = 396.4$  Hz, 1H), 3.16 – 2.90 (m, 2H), 2.76 (dd,  $J = 12.4, 6.1$  Hz, 1H), 2.38 (t,  $J = 7.2$  Hz, 2H), 2.10 (s, 1H), 1.98 (dt,  $J = 14.7, 7.5$  Hz, 2H), 1.86–1.37 (m, 6H);  $^{13}\text{C}$  NMR (126 MHz,  $\text{CDCl}_3$ )  $\delta$  179.98 (s), 134.70 (q,  $J = 302.4$ ), 50.89 (s), 50.78 (s), 34.11 (s), 33.96 (s), 33.87 (s), 27.35 (s), 27.25 (s), 26.37 (s), 26.29 (s), 24.43 (s), 20.89 (s);  $^{19}\text{F}$  NMR (470 MHz,  $\text{CDCl}_3$ )  $\delta$  -40.98 (d,  $J = 3.5$  Hz). GC-MS (EI) Calcd. for  $\text{C}_9\text{H}_{15}\text{F}_3\text{O}_2\text{S}_2$  276.05, found 276.02.

## Reference

- [1] X.-X. Shao, C.-F. Xu, Q.-L. Shen, *J. Org. Chem.* 2015, 80, 3012–302.
- [2] G.-Y. Yin, I. Kalvet, F. Schoenebeck, *J. Am. Chem. Soc.* 2015, 137, 4164–4172.
- [3] K. Kang, C.-F. Xu, Q.-L. Shen, *Org. Chem. Front.*, 2014, 1, 294–297.
- [4] A. Harsányi, É. Dorkó, J. Rábai, *J. Fluorine Chem.* 2011, 132, 1241–1246.
- [5] D. J. Adams, A. Goddard, D. J. Macquarrie, *Chem. Commun.*, 2000, 987–988.
- [6] G. Danoun, B. Bayarmagnai, L. J. Goossen, *Chem. Sci.*, 2014, 5, 1312–1316.
- [7] C. Chen, X.-H. Xu, F.-L. Qing, *Org. Lett.* 2014, 16, 3372–3375.
- [8] R.-Y. Tang, P. Zhong, Q.-L. Lin, *J. Fluorine Chem.* 2007, 128, 636–640.
- [9] S. Potash, S. Rozen, *J. Org. Chem.* 2014, 79, 11205–11208.
- [10] C. Matheis, M.-Y. Wang, L. J. Goossen, *Synlett.* 2015, 26, 1628–1632.

### 3. NMR Spectra

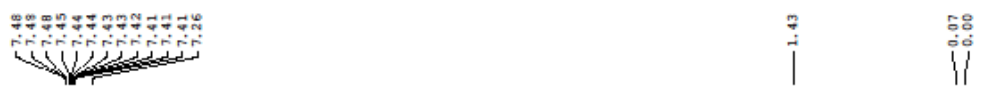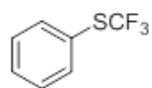

2a

500 MHz, CDCl<sub>3</sub>

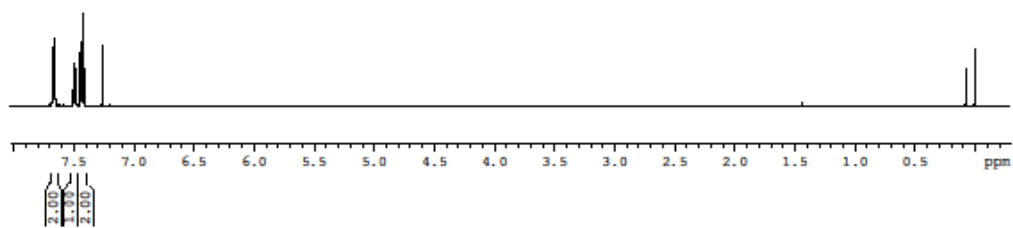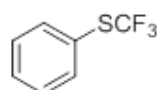

2a

470 MHz, CDCl<sub>3</sub>

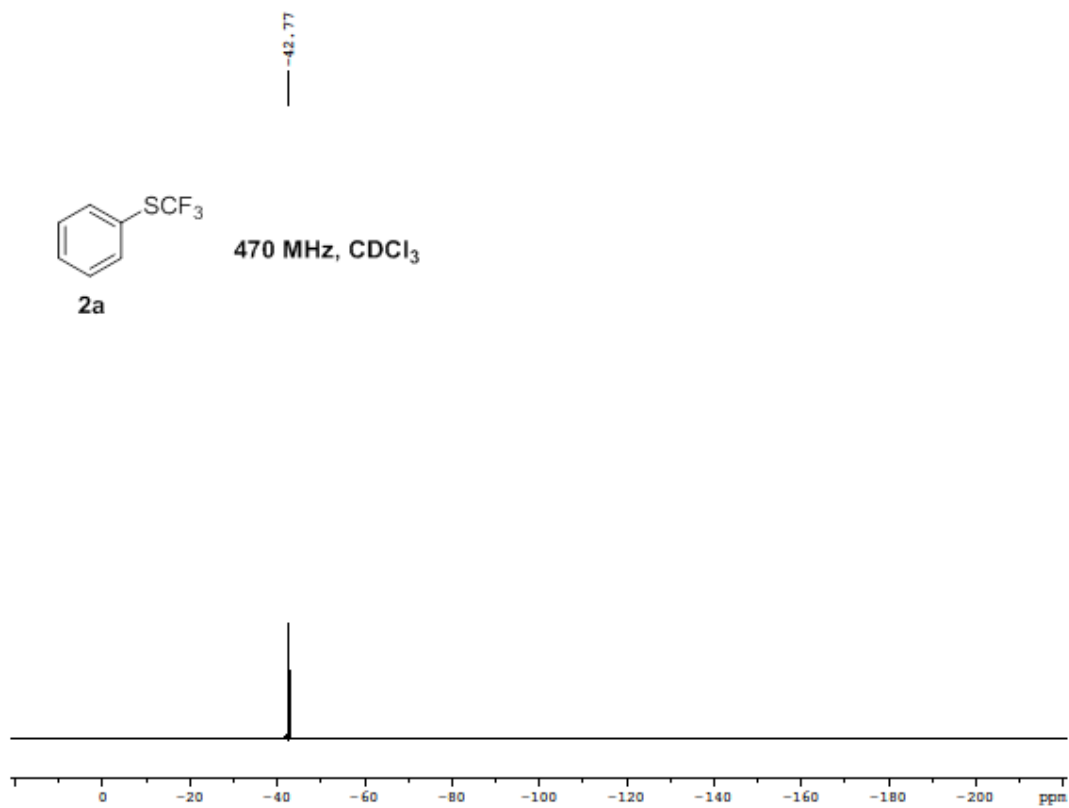



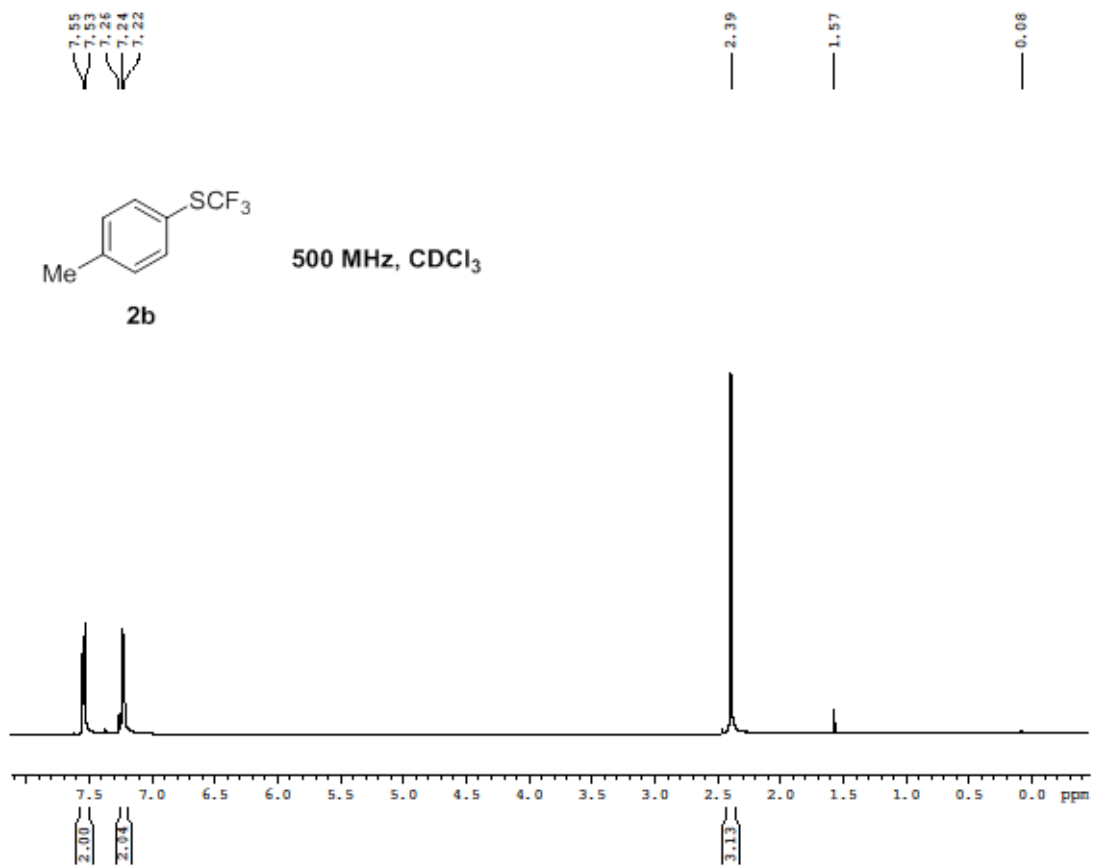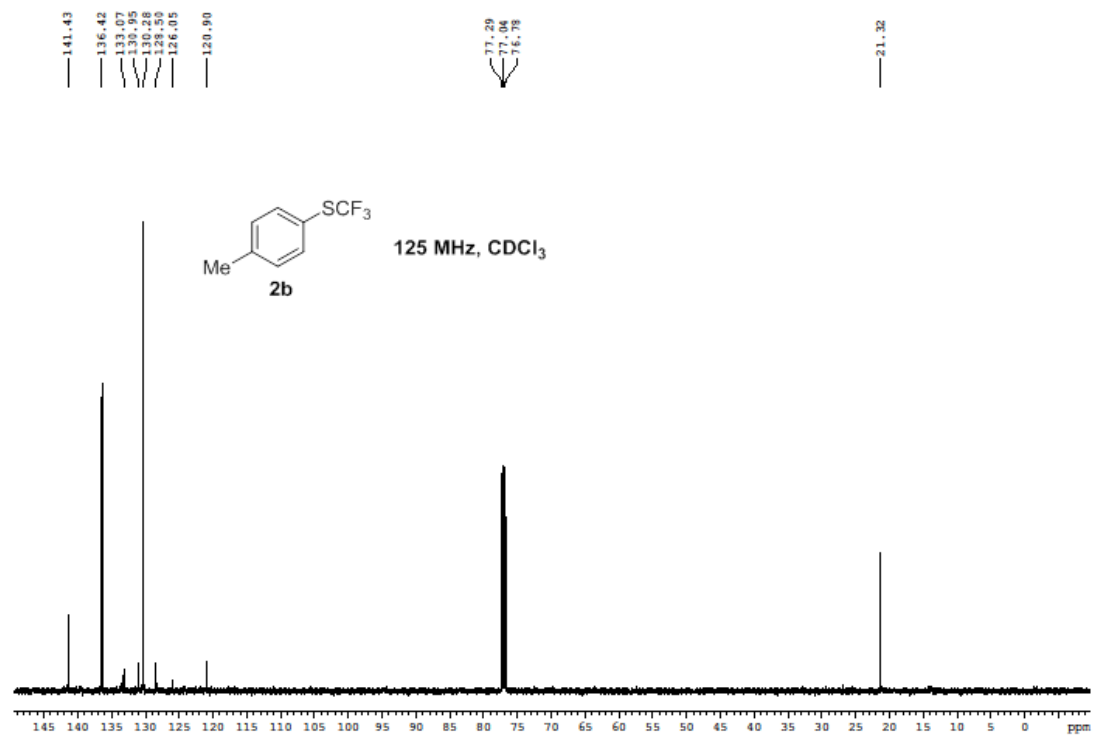

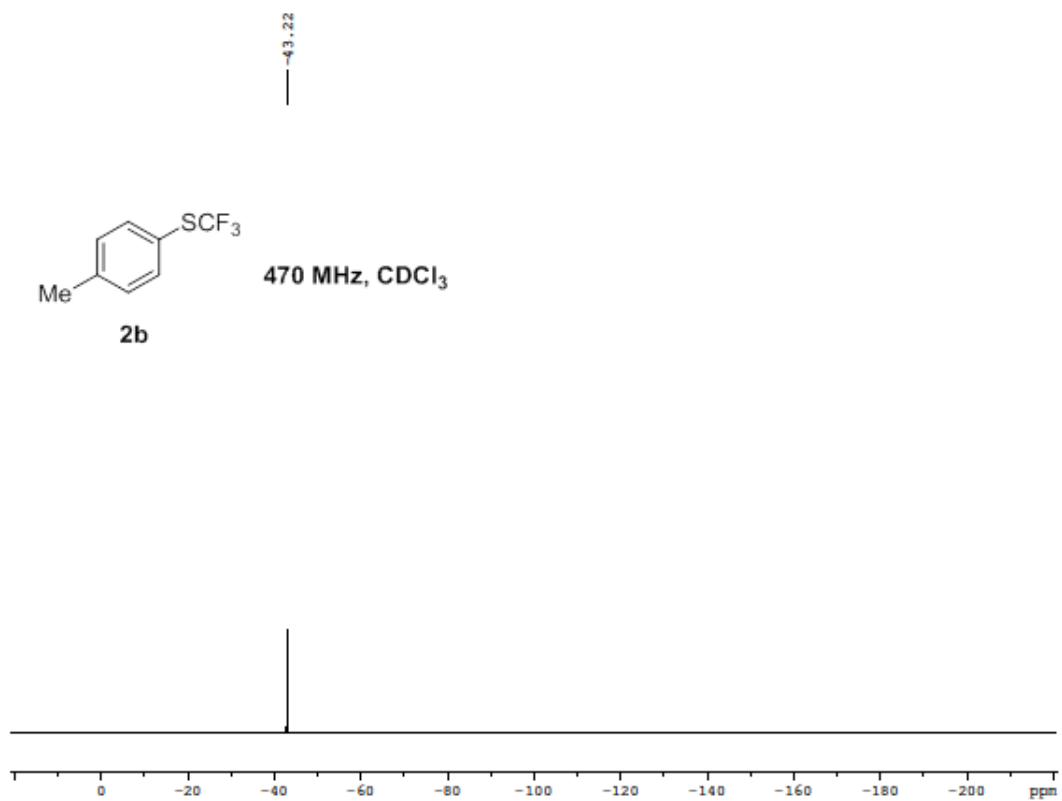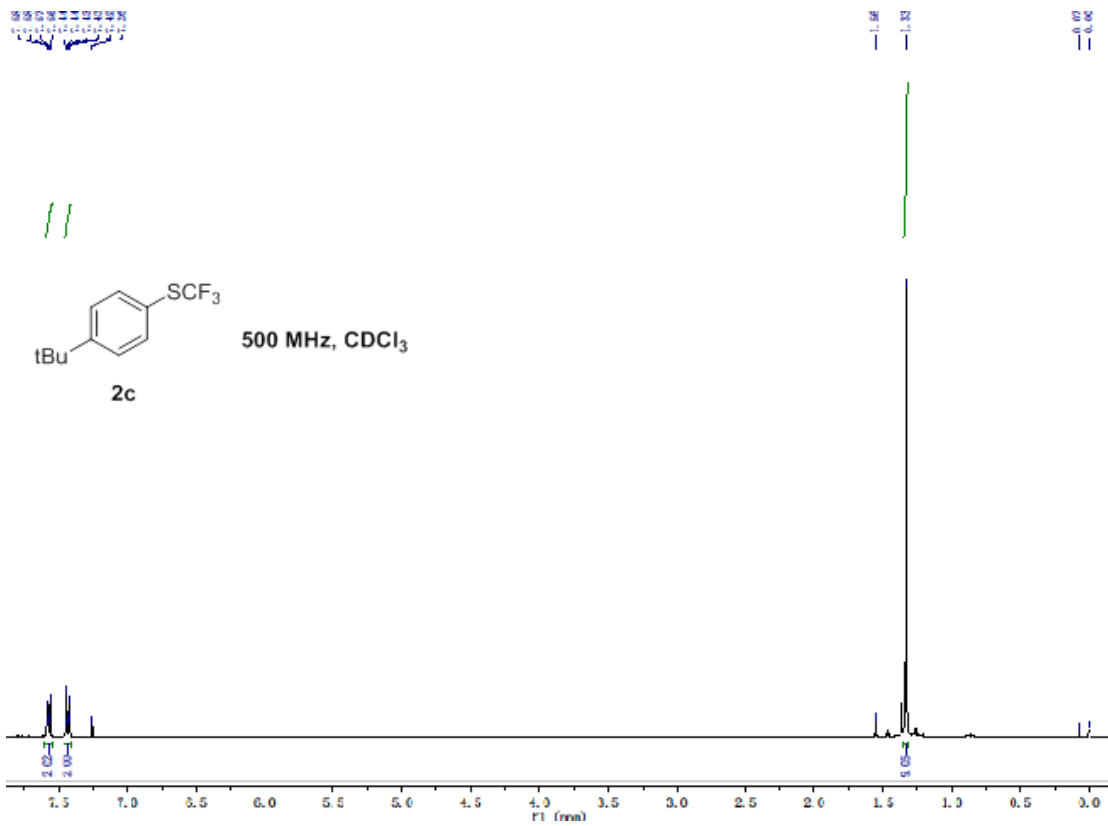

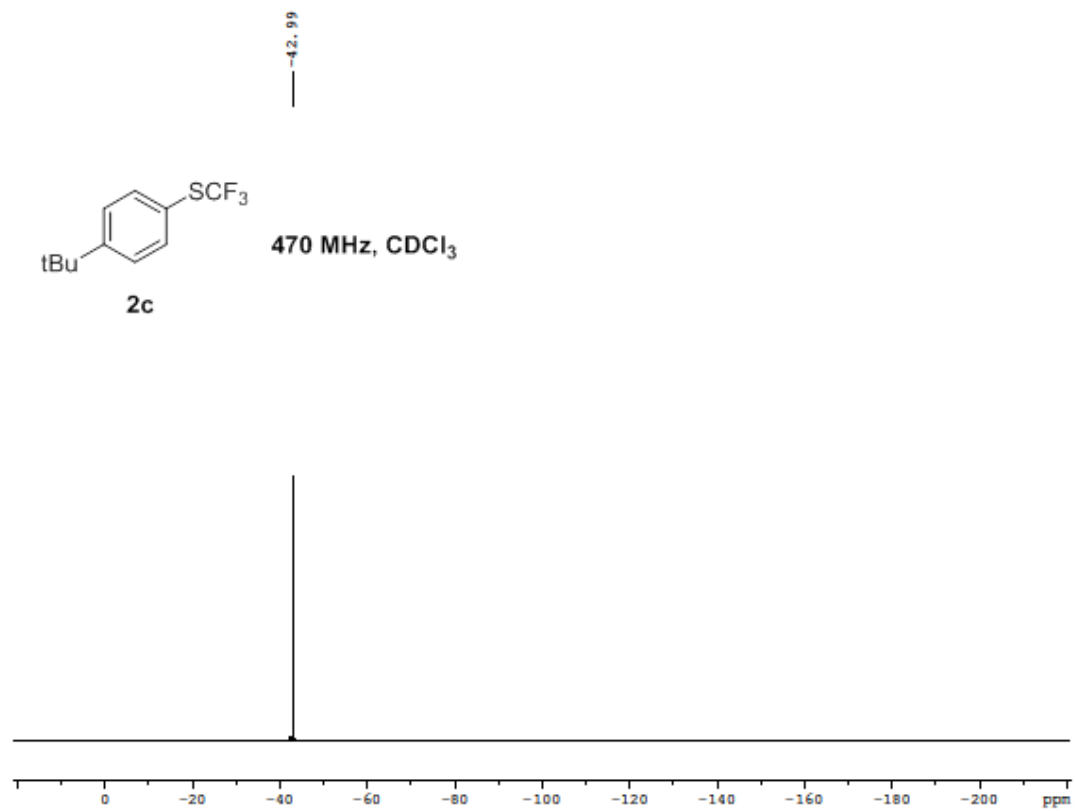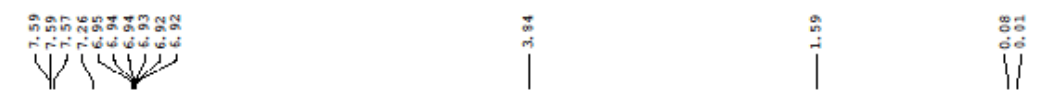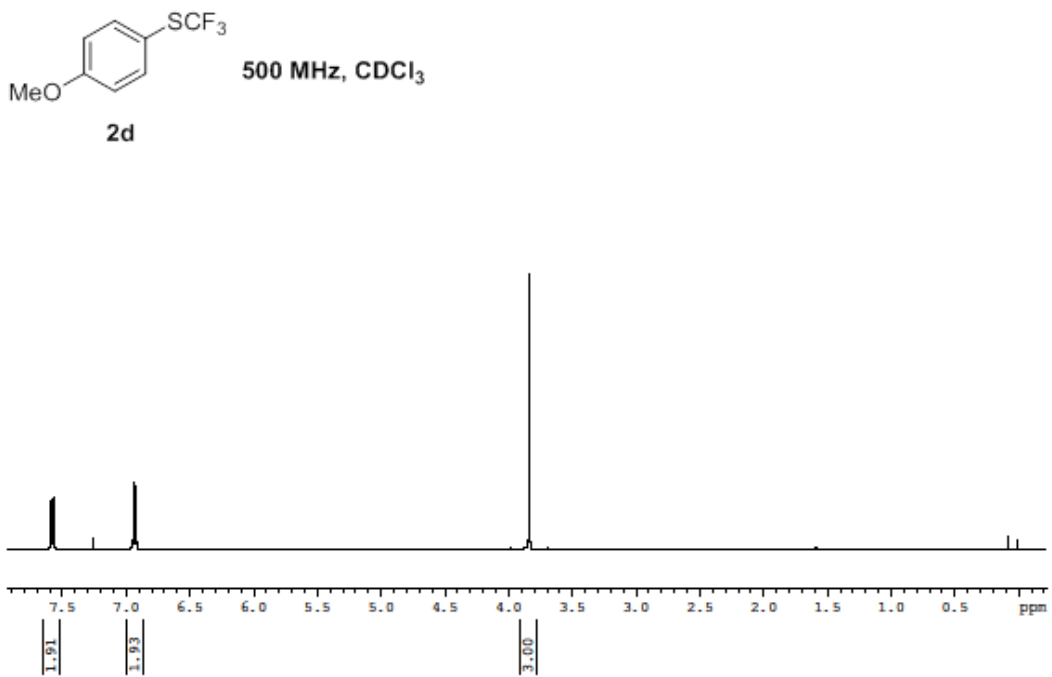

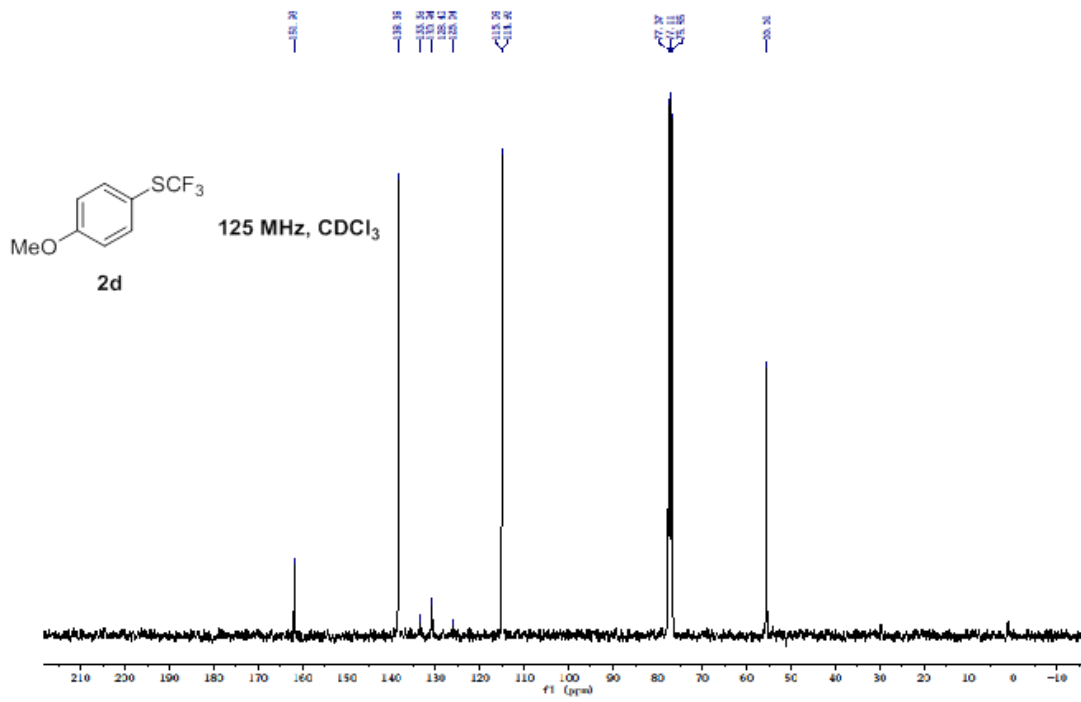

-4.3, 04

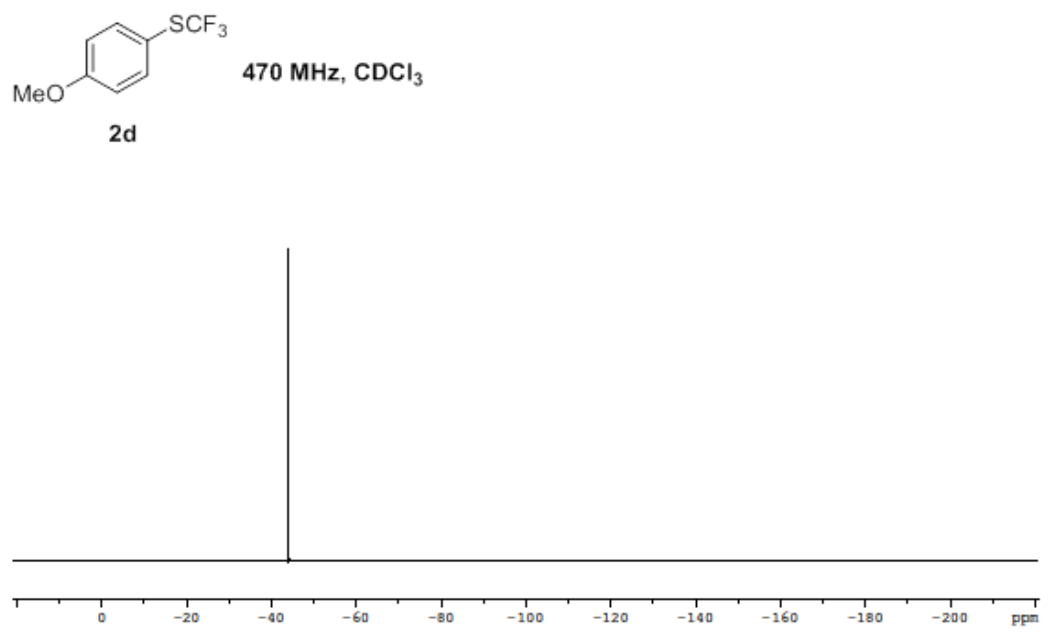

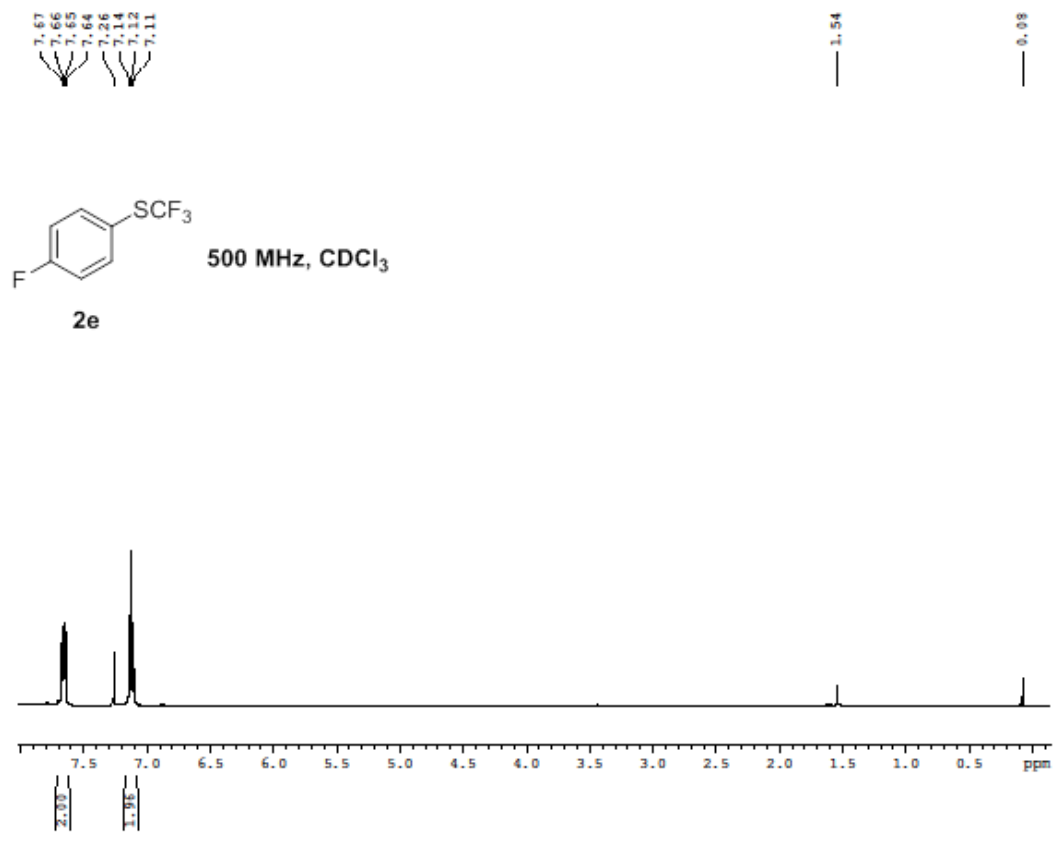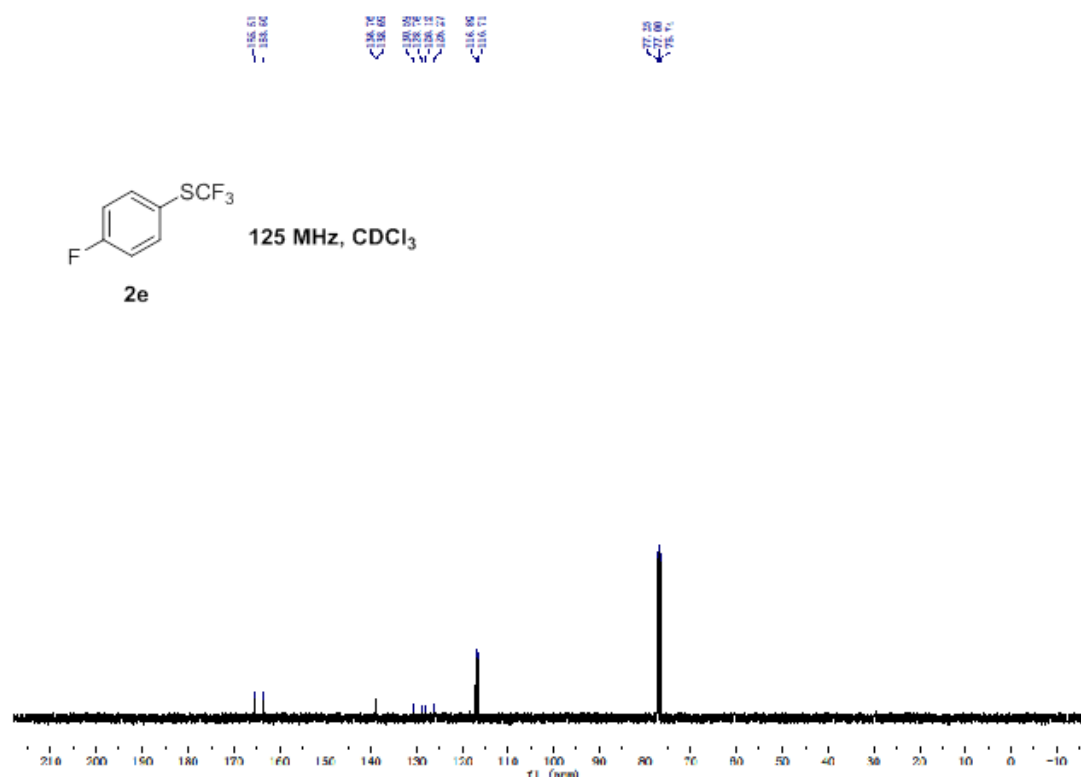

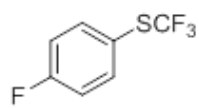

2e

470 MHz, CDCl<sub>3</sub>

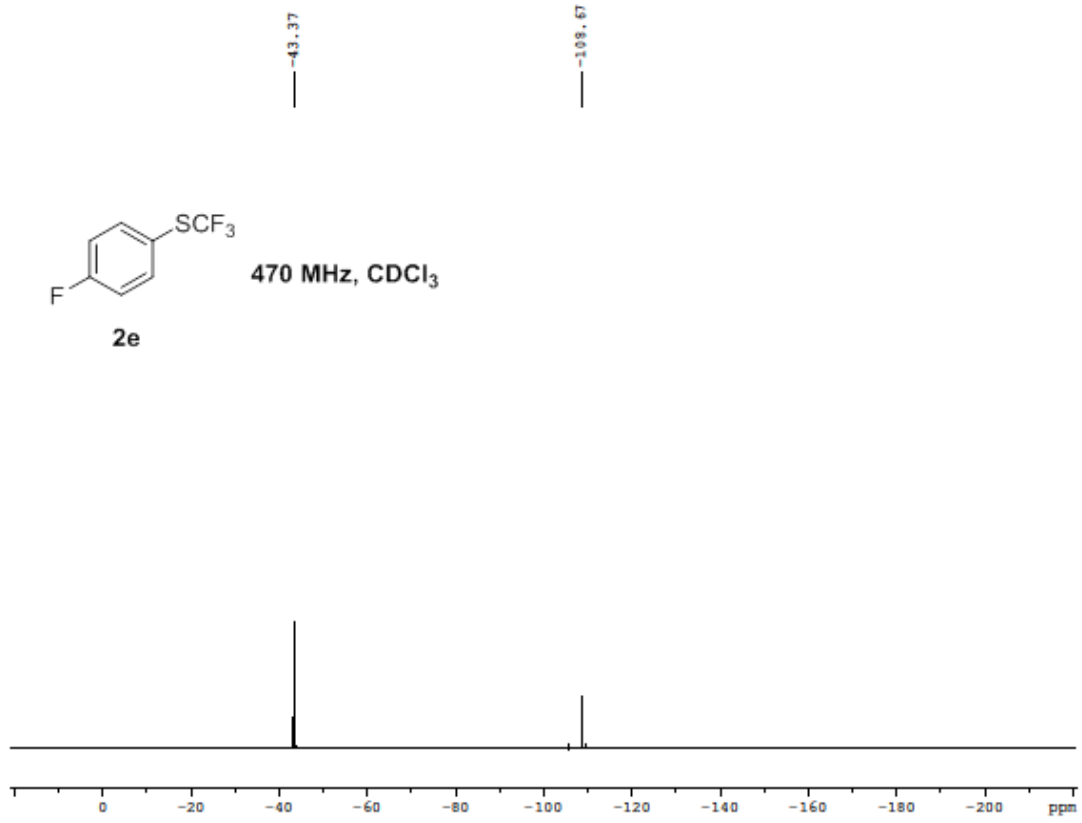

7.60  
7.58  
7.41  
7.40  
7.26

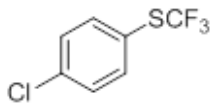

2f

500 MHz, CDCl<sub>3</sub>

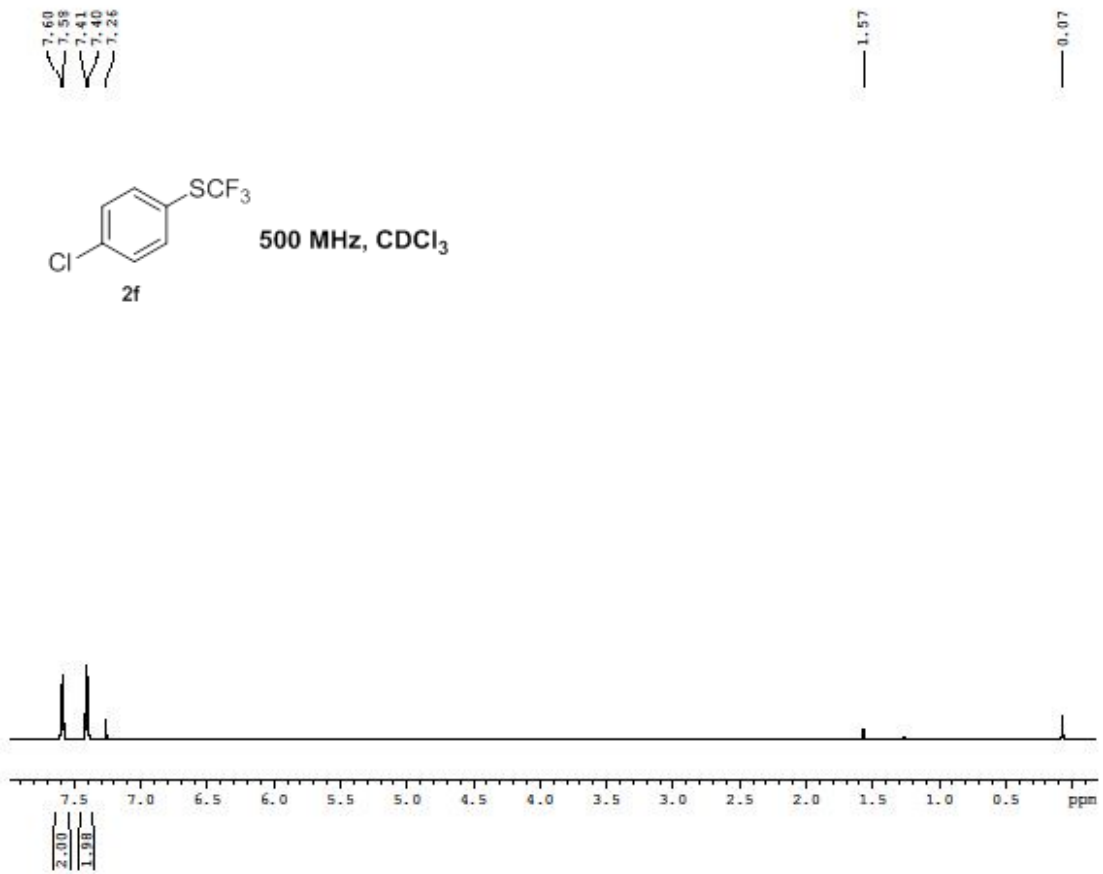

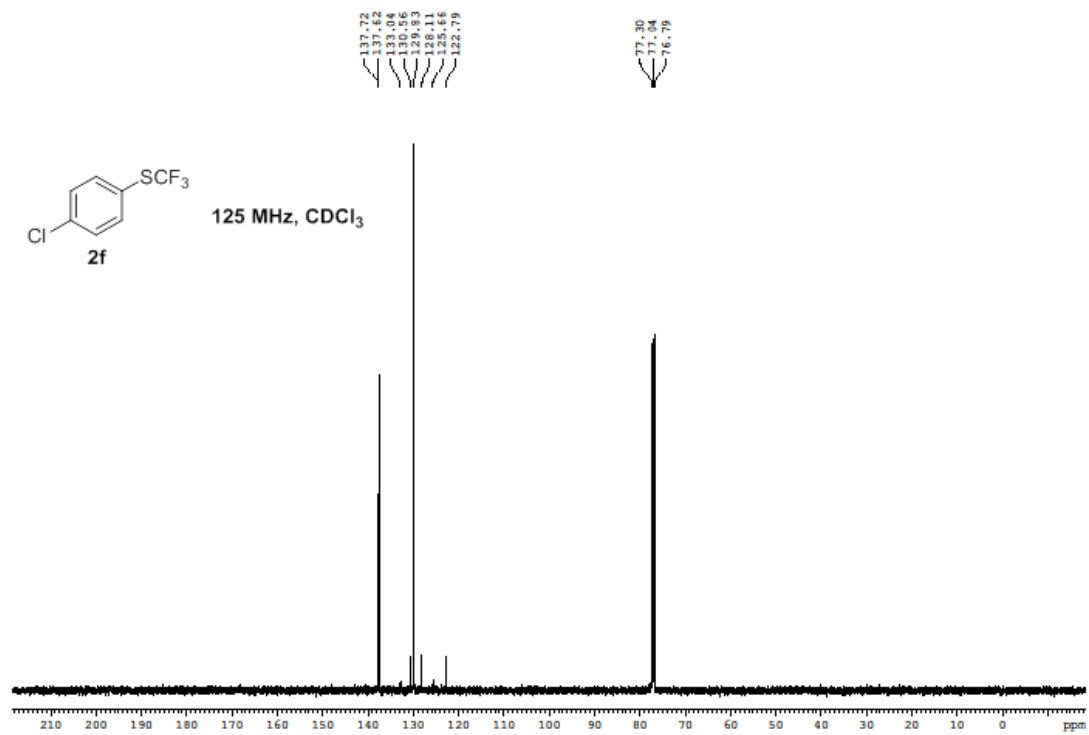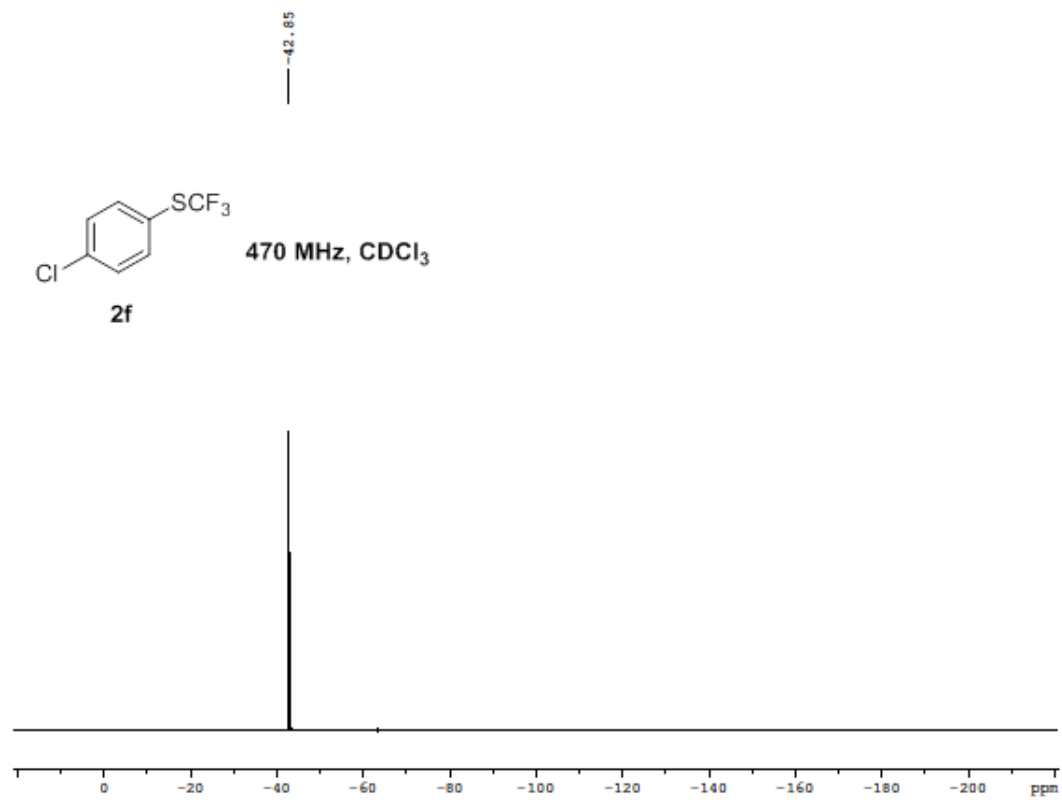

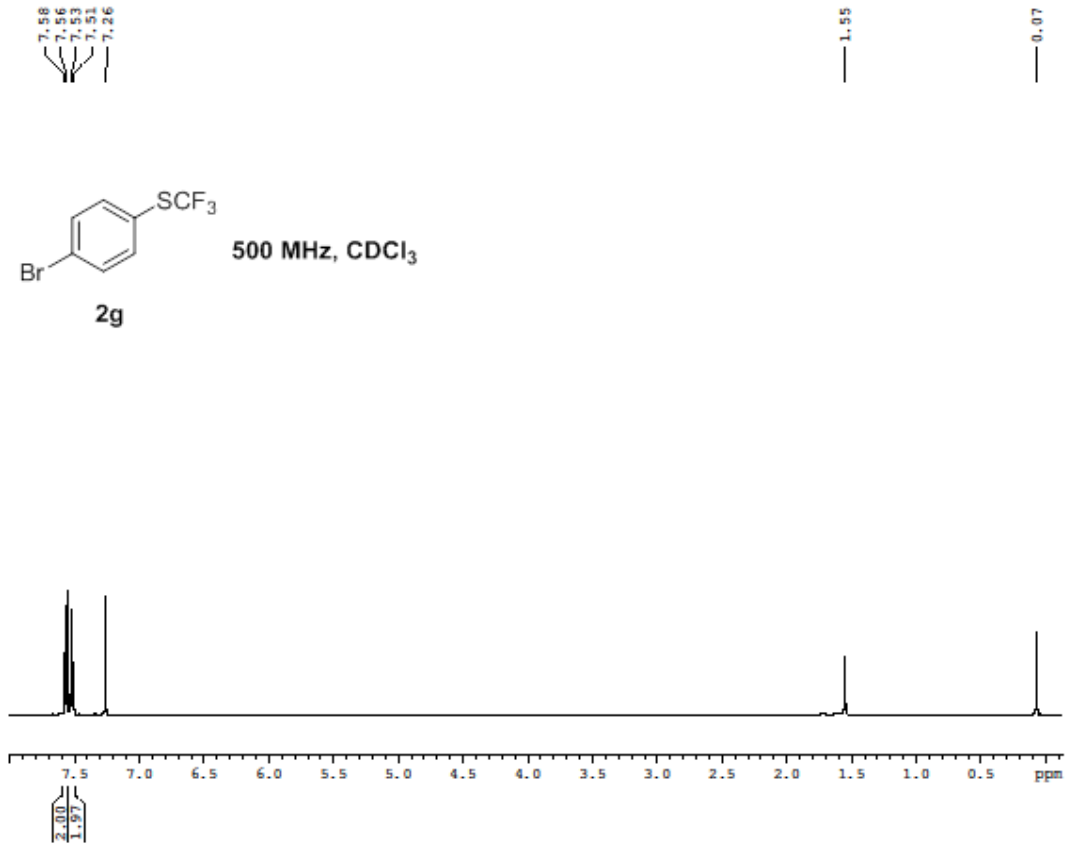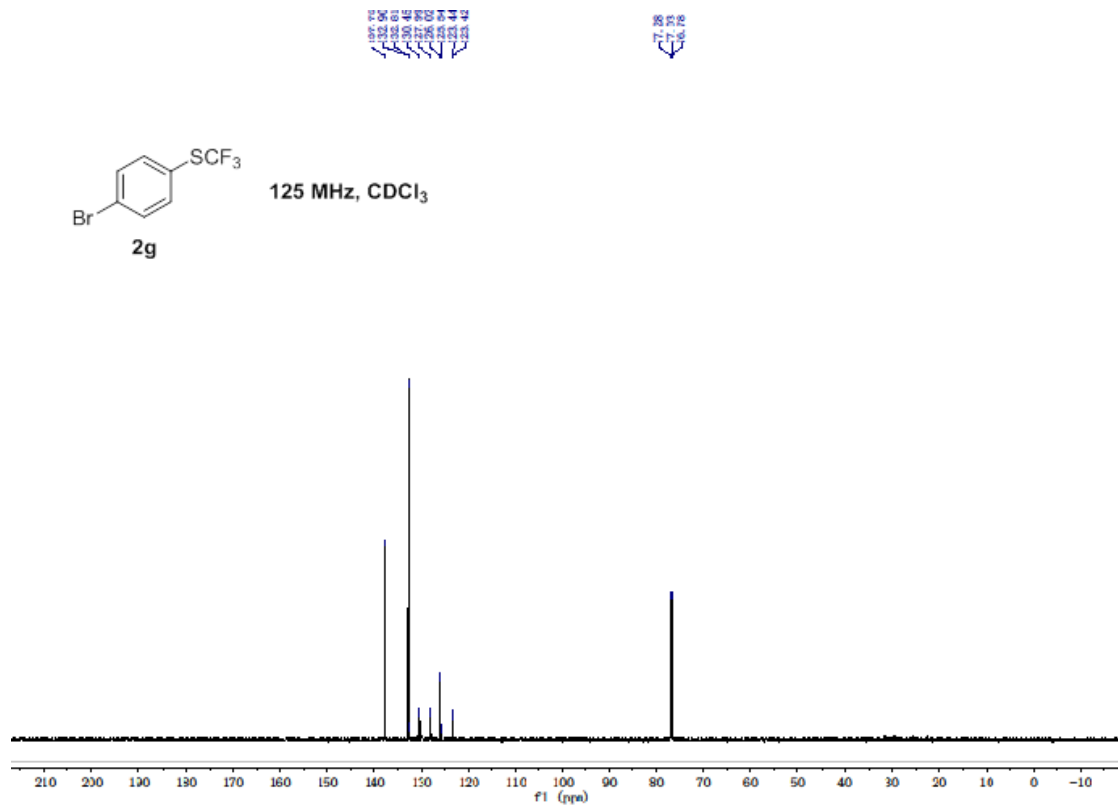



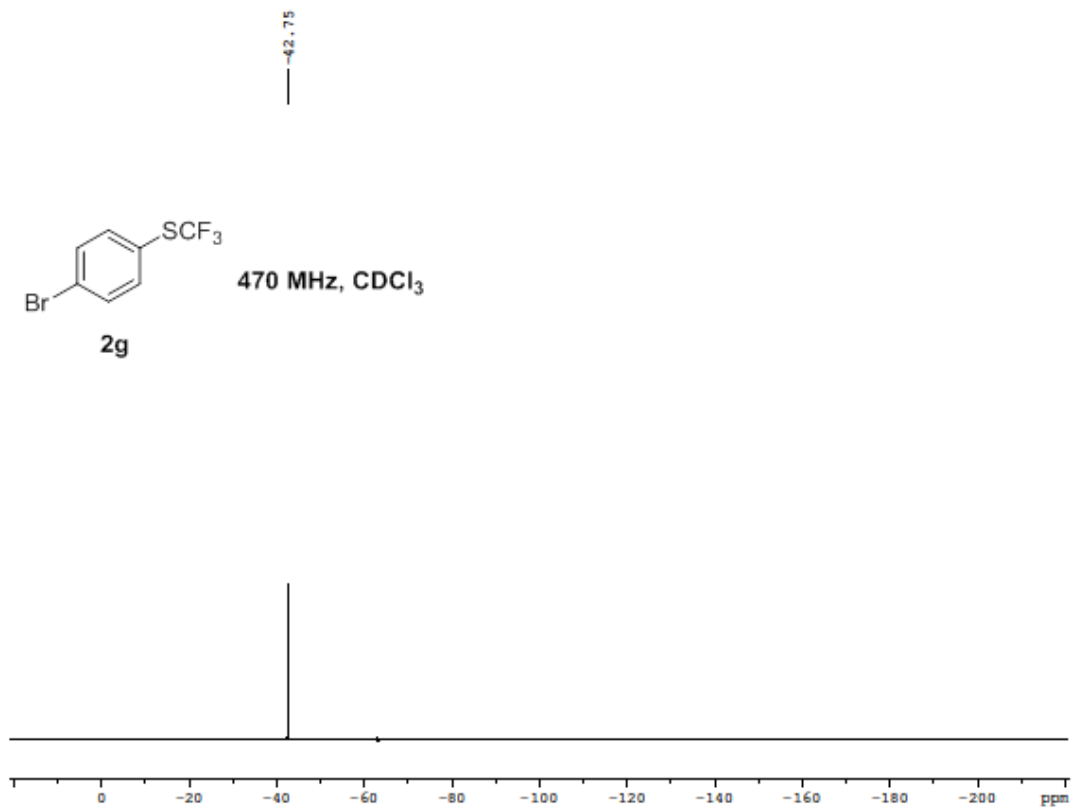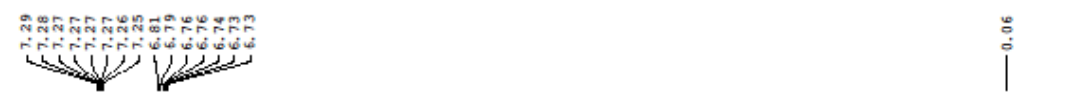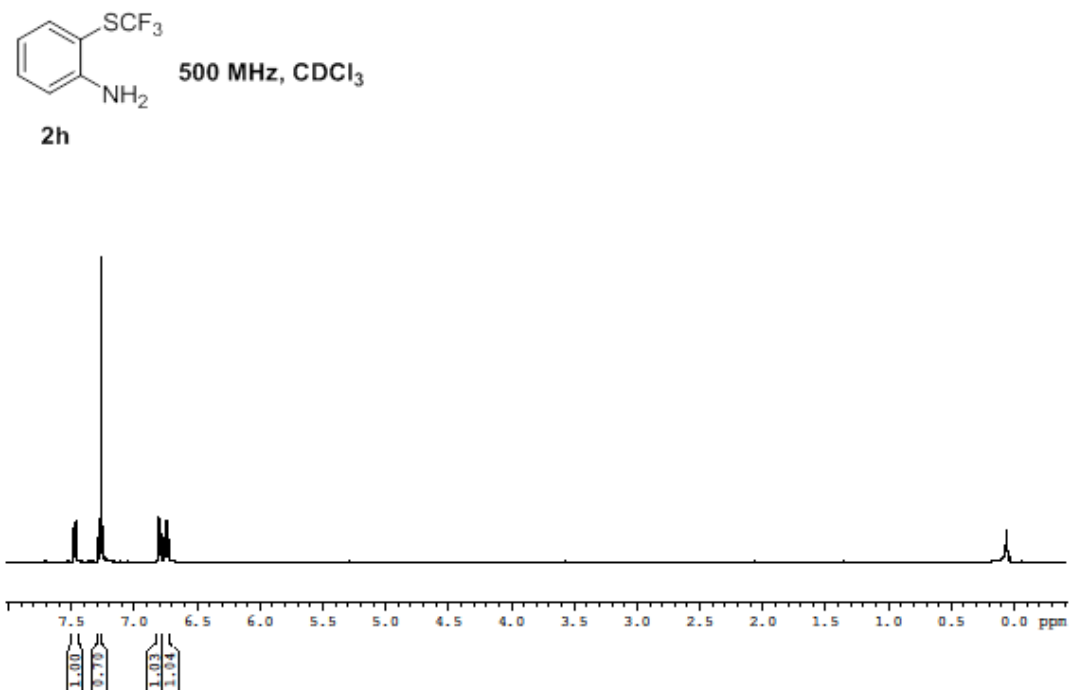

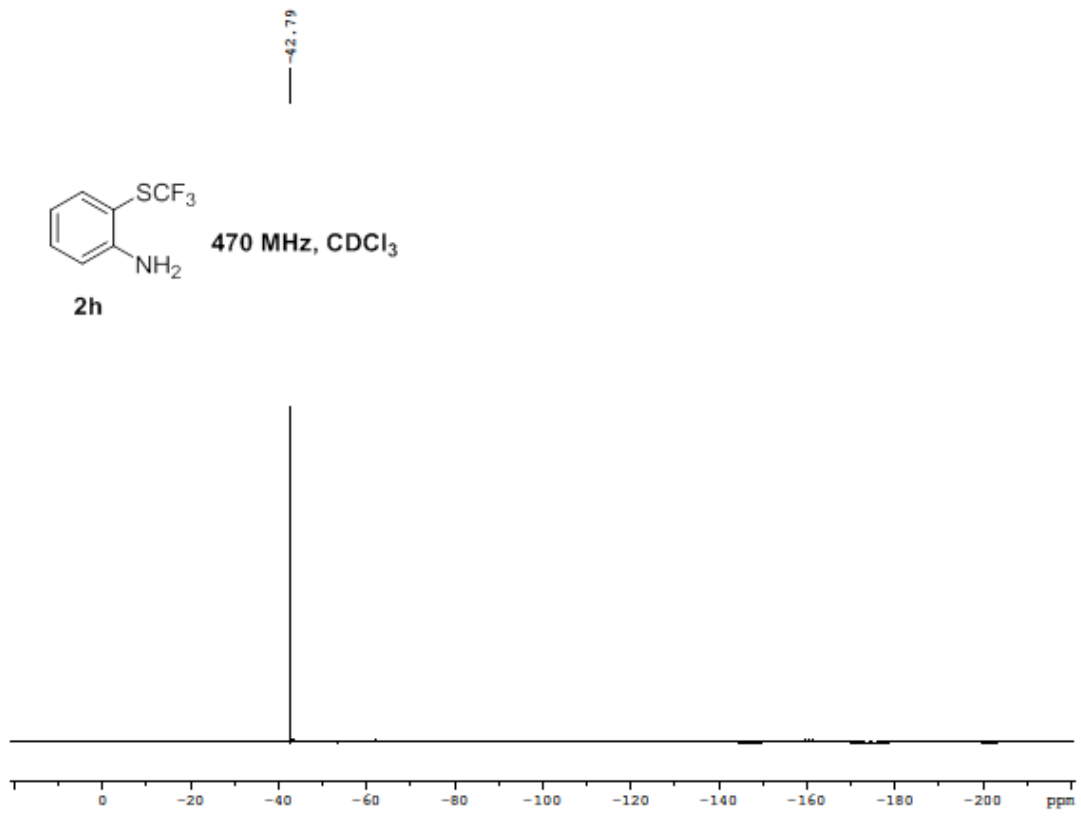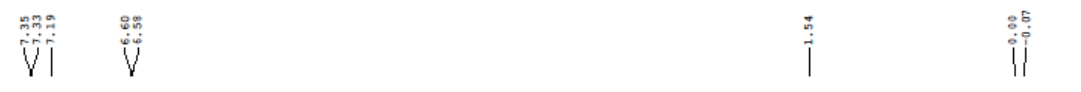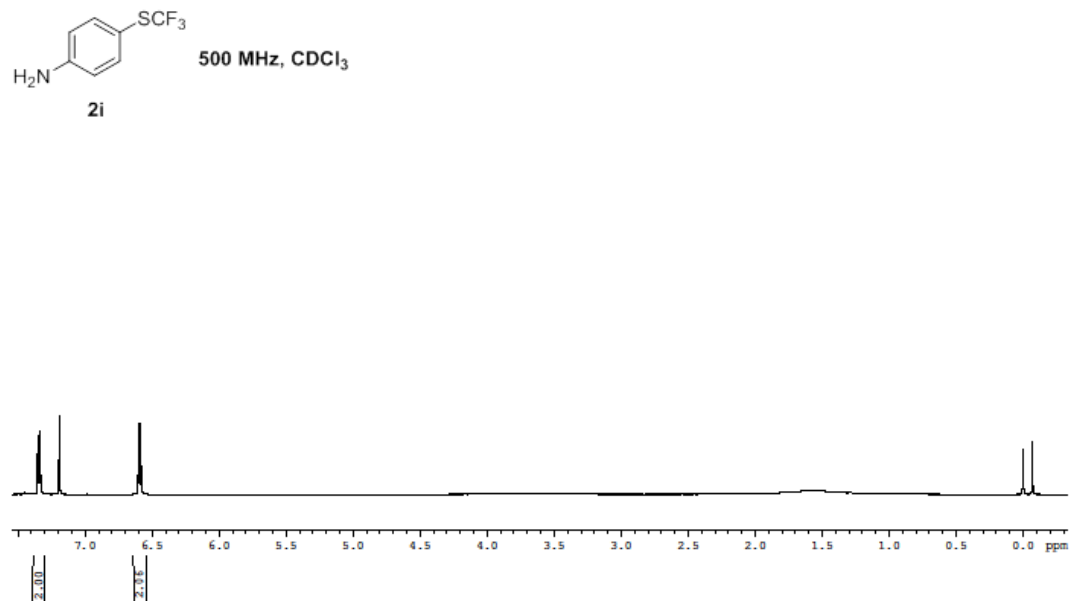

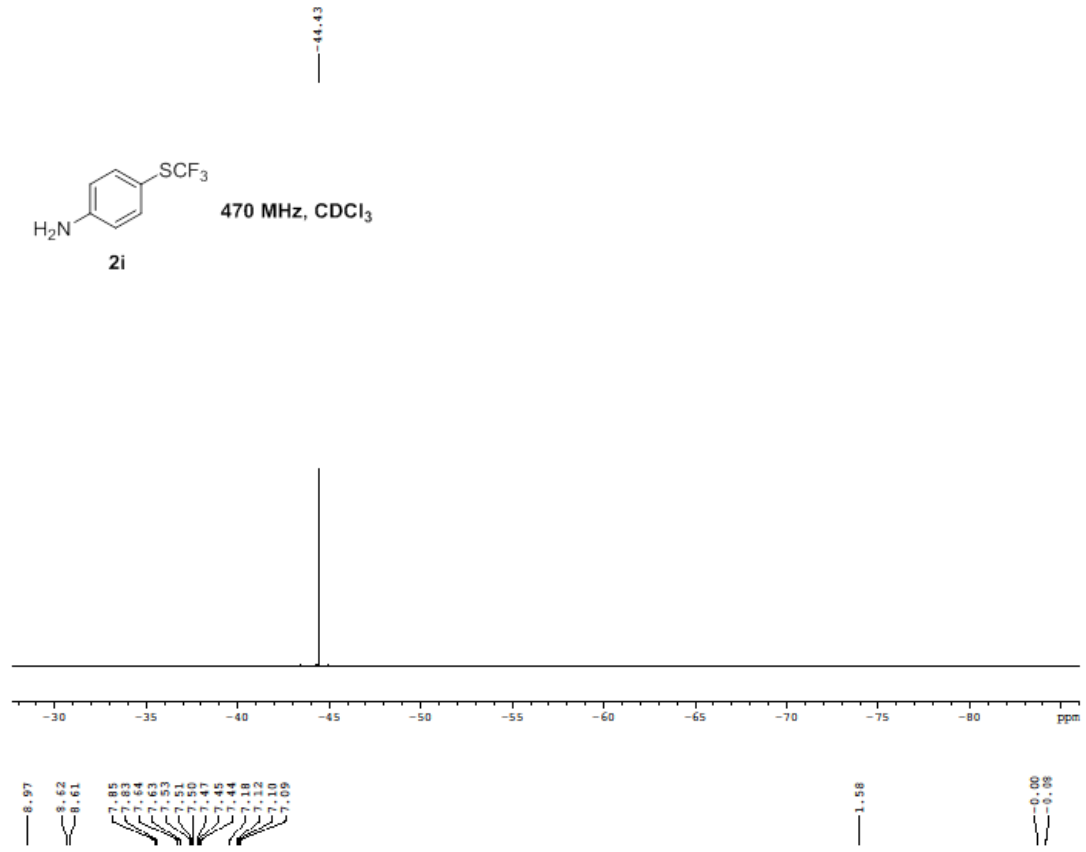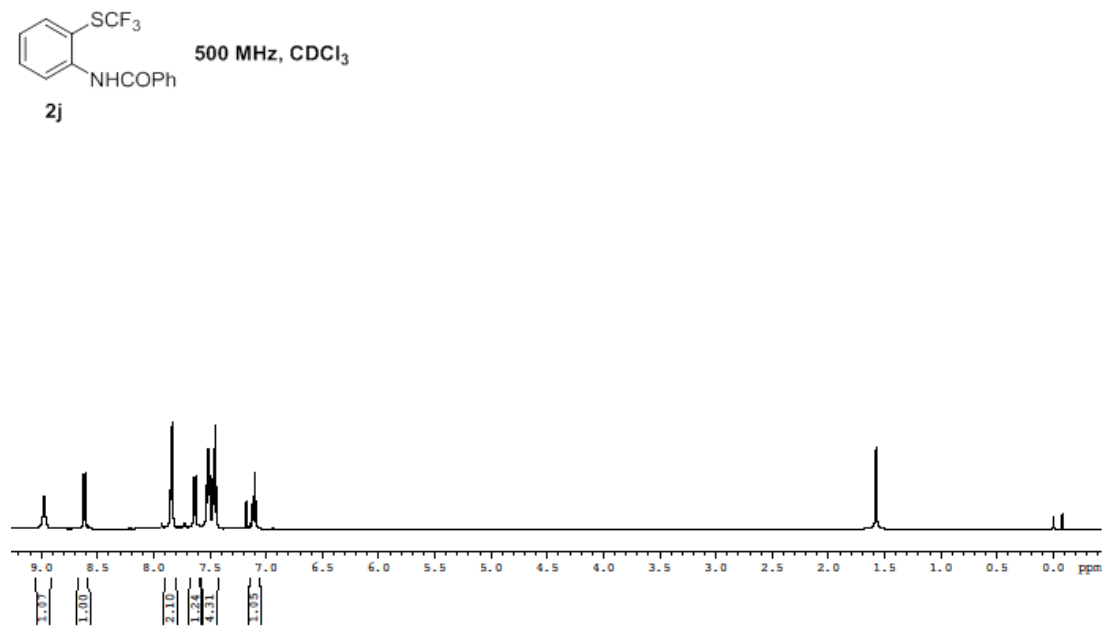

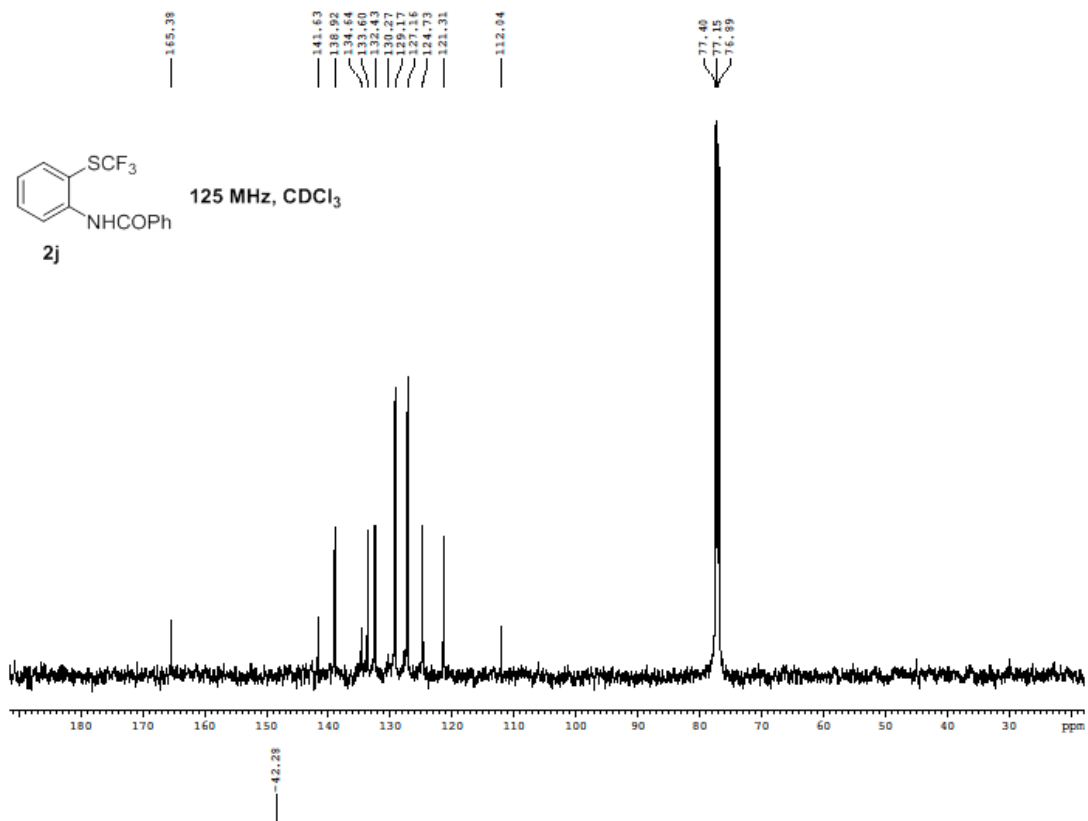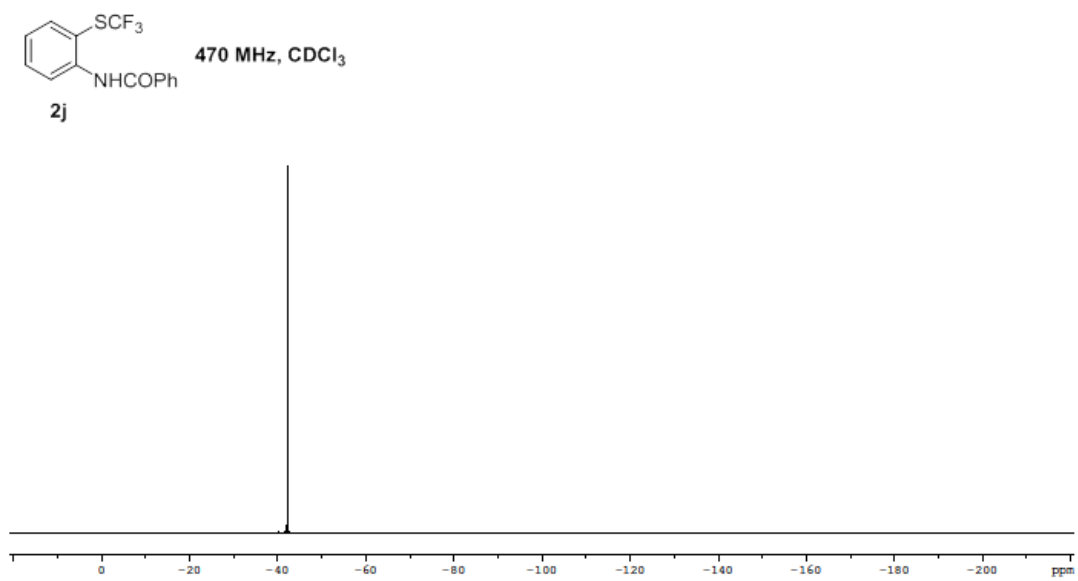

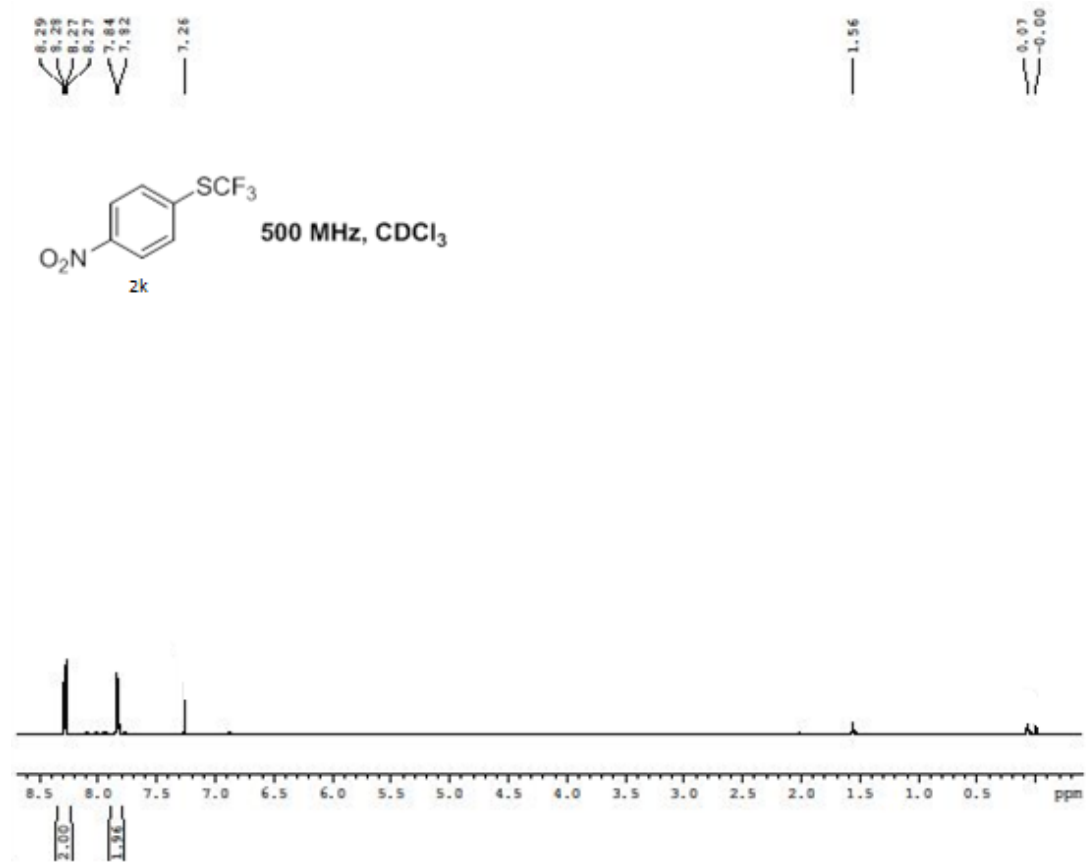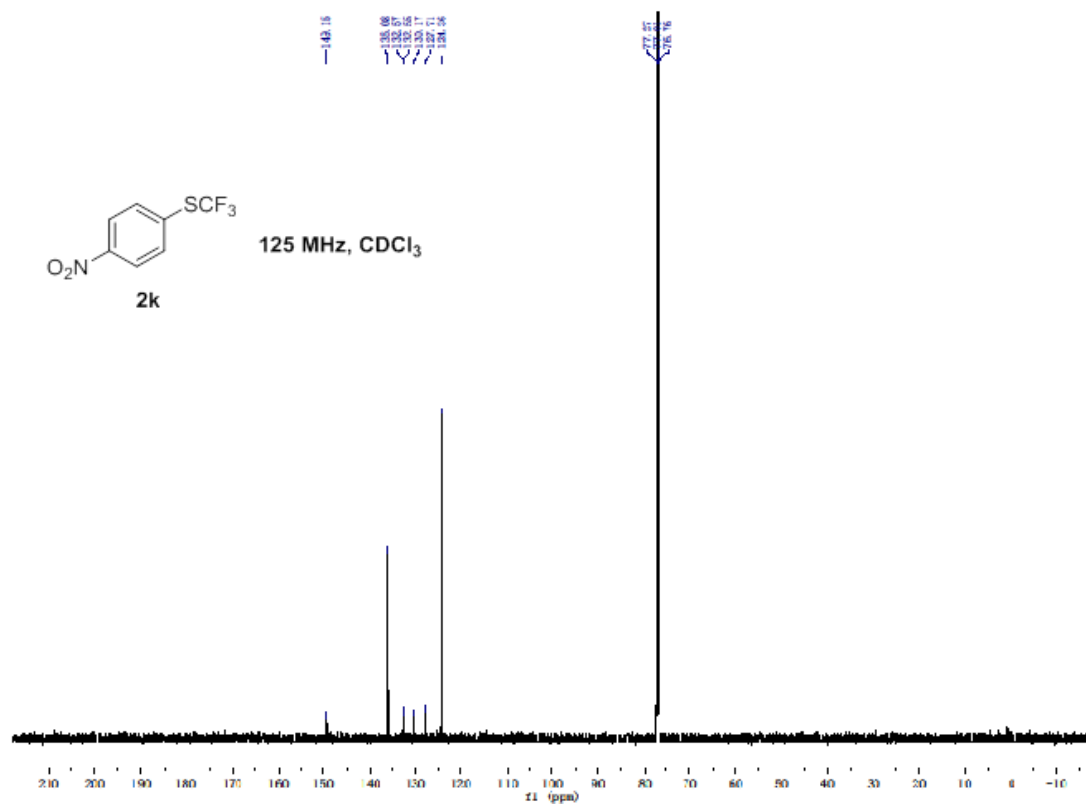

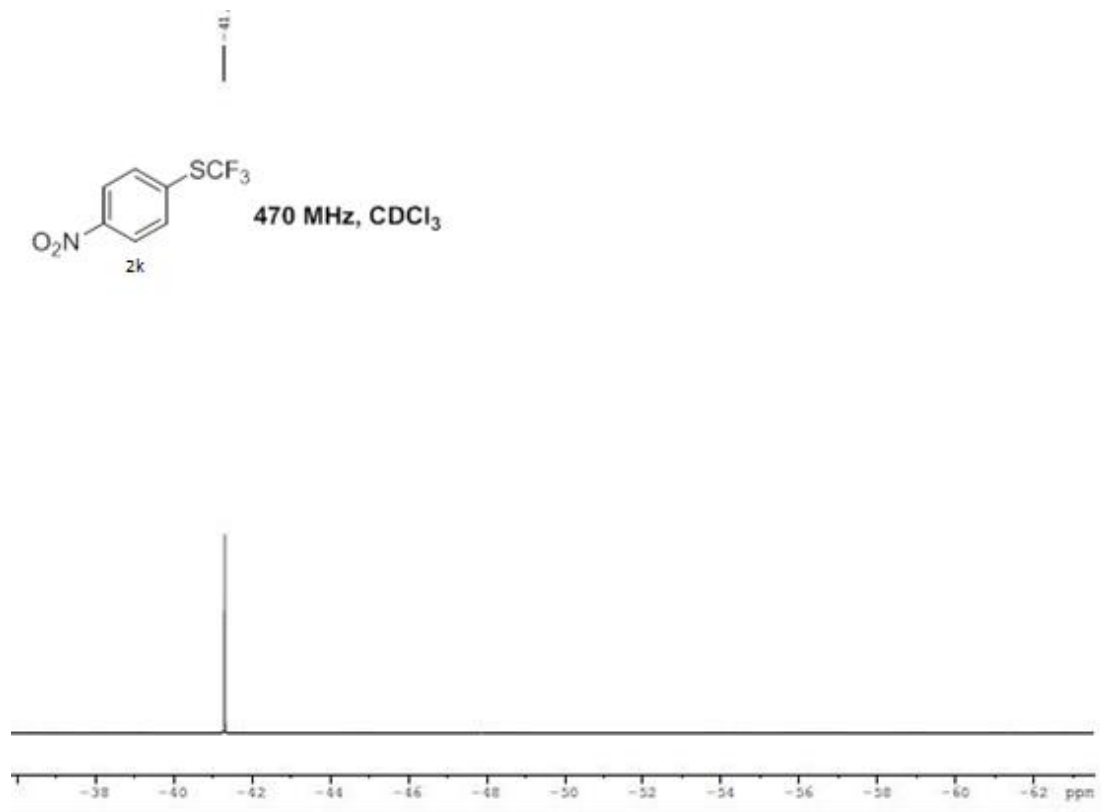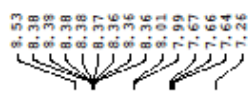

1.64

0.07  
-0.00

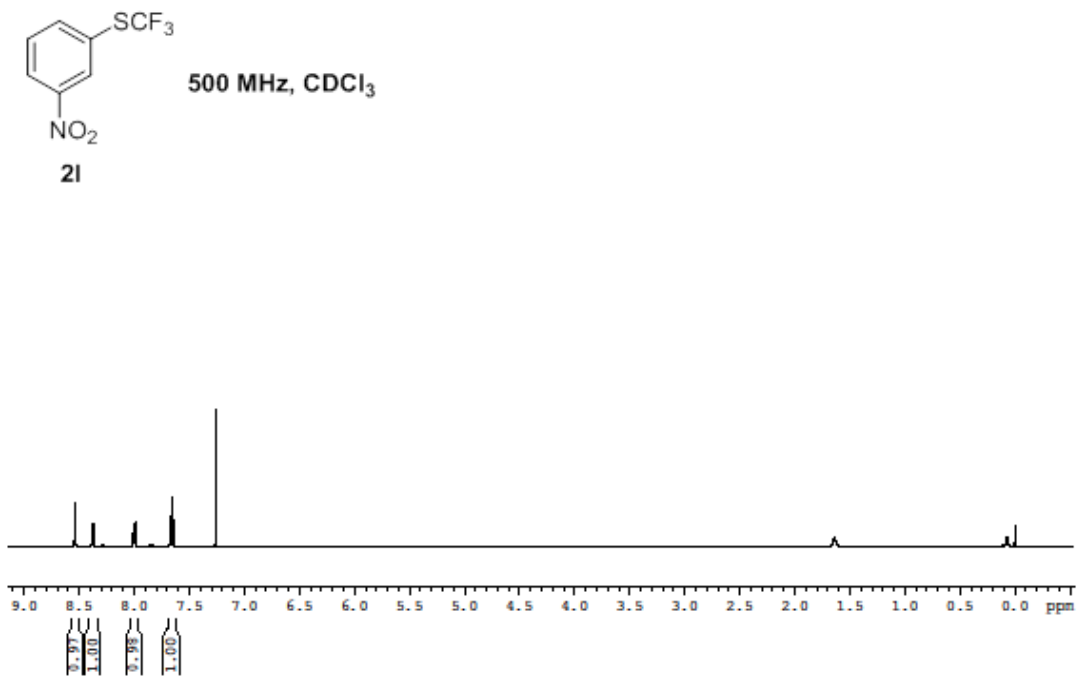

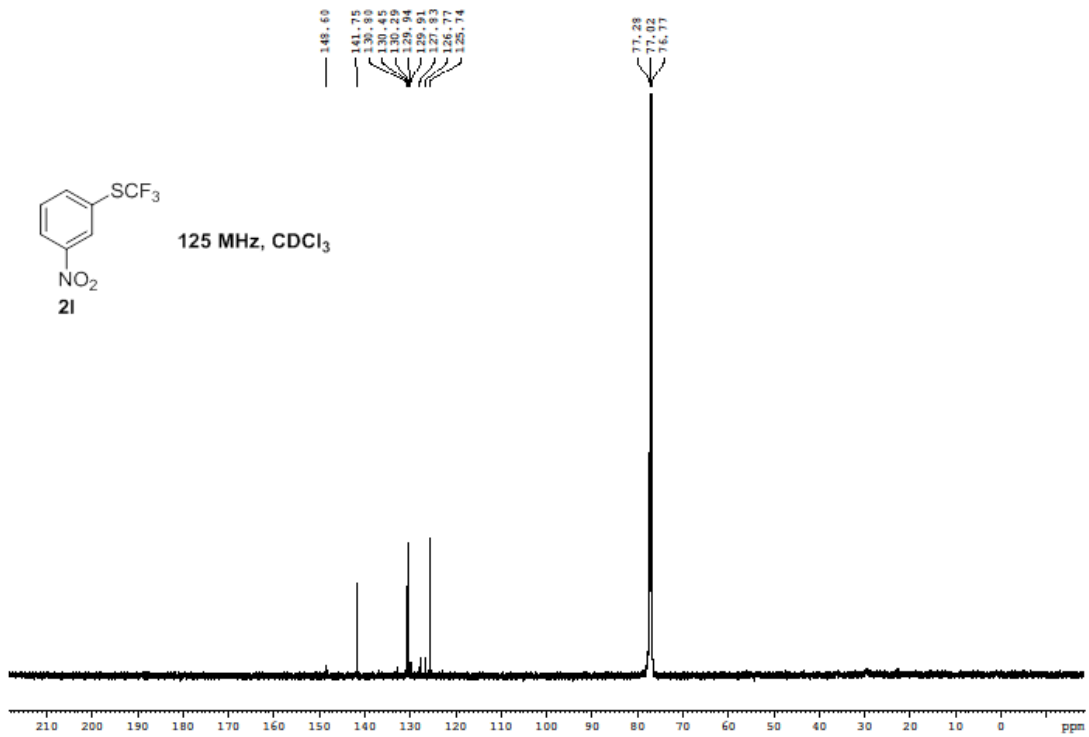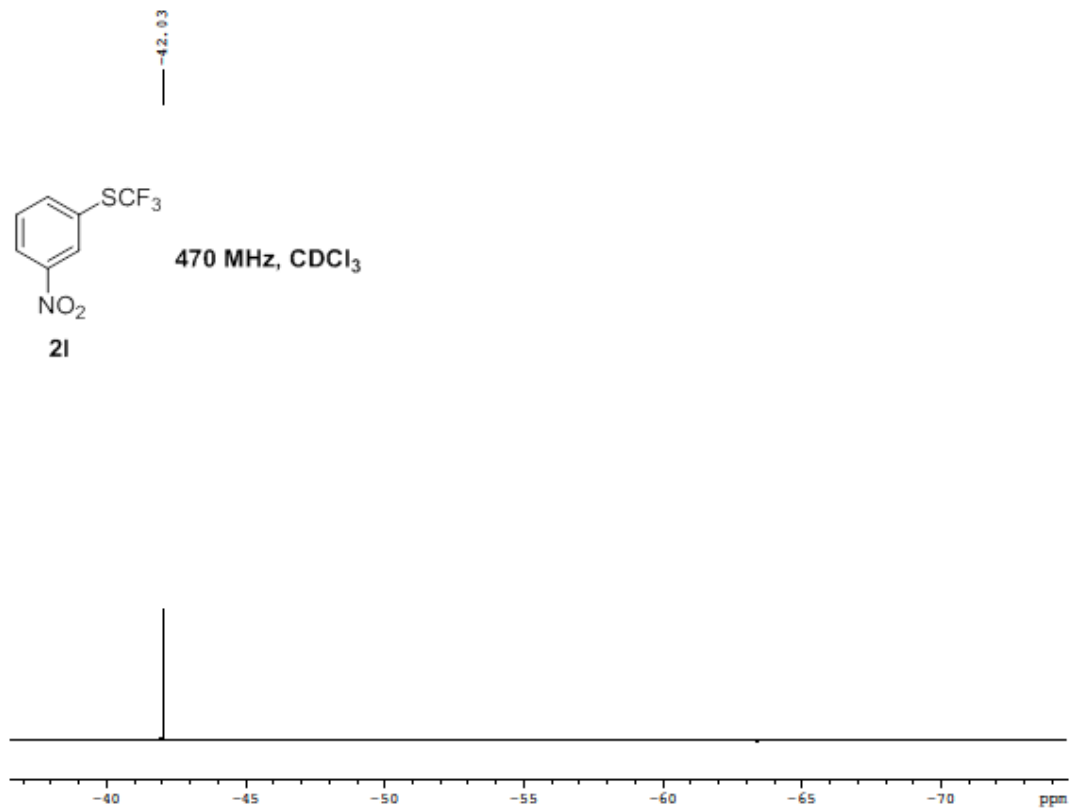

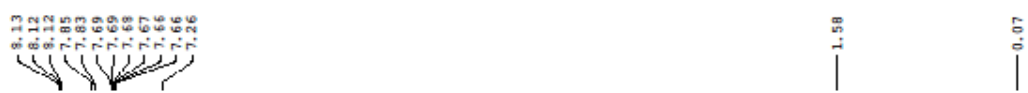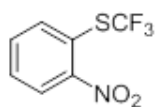

500 MHz, CDCl<sub>3</sub>

2m

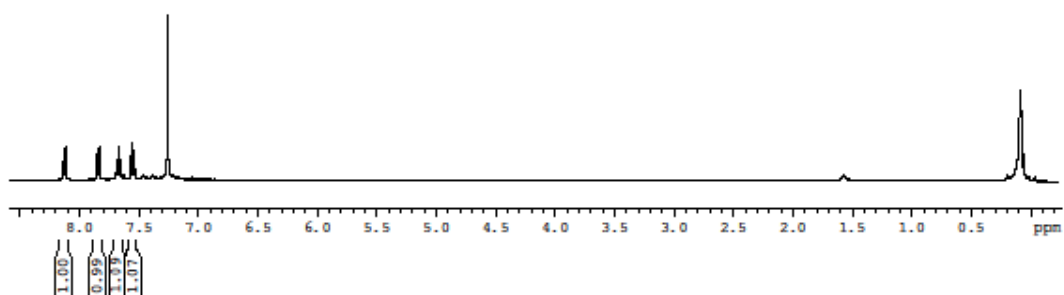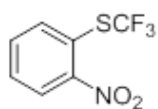

470 MHz, CDCl<sub>3</sub>

2m

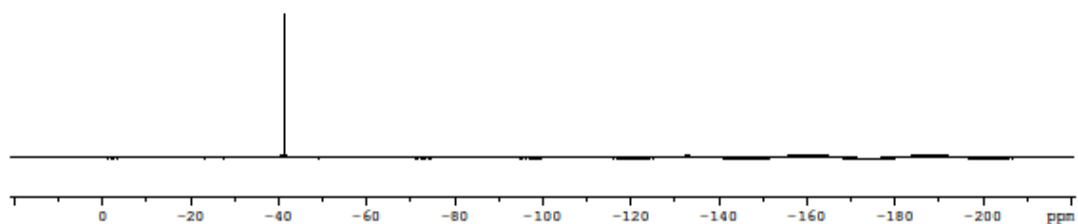



8.13  
8.11  
7.78  
7.76  
7.62  
7.60  
7.59  
7.49  
7.46  
7.26

1.57

0.07

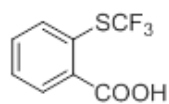

500 MHz, CDCl<sub>3</sub>

2n

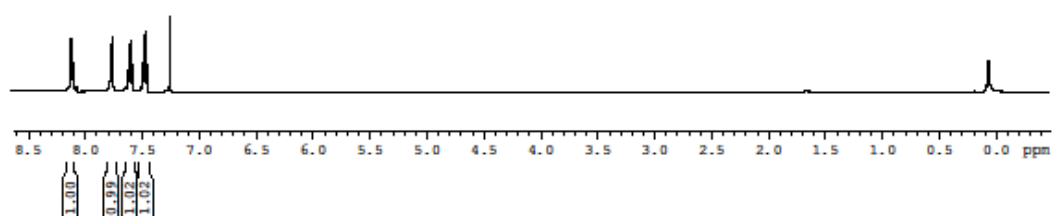

171.42

133.42  
132.22  
131.02  
129.82  
128.62  
127.42  
126.22  
125.02  
123.82  
122.62  
121.42  
120.22  
119.02  
117.82  
116.62  
115.42  
114.22  
113.02  
111.82  
110.62  
109.42  
108.22  
107.02  
105.82  
104.62  
103.42  
102.22  
101.02  
99.82  
98.62  
97.42  
96.22  
95.02  
93.82  
92.62  
91.42  
90.22  
89.02  
87.82  
86.62  
85.42  
84.22  
83.02  
81.82  
80.62  
79.42  
78.22  
77.02  
75.82  
74.62  
73.42  
72.22  
71.02  
69.82  
68.62  
67.42  
66.22  
65.02  
63.82  
62.62  
61.42  
60.22  
59.02  
57.82  
56.62  
55.42  
54.22  
53.02  
51.82  
50.62  
49.42  
48.22  
47.02  
45.82  
44.62  
43.42  
42.22  
41.02  
39.82  
38.62  
37.42  
36.22  
35.02  
33.82  
32.62  
31.42  
30.22  
29.02  
27.82  
26.62  
25.42  
24.22  
23.02  
21.82  
20.62  
19.42  
18.22  
17.02  
15.82  
14.62  
13.42  
12.22  
11.02  
9.82  
8.62  
7.42  
6.22  
5.02  
3.82  
2.62  
1.42  
0.22

23.37  
23.31  
23.25

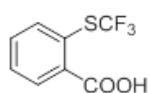

125 MHz, CDCl<sub>3</sub>

2n

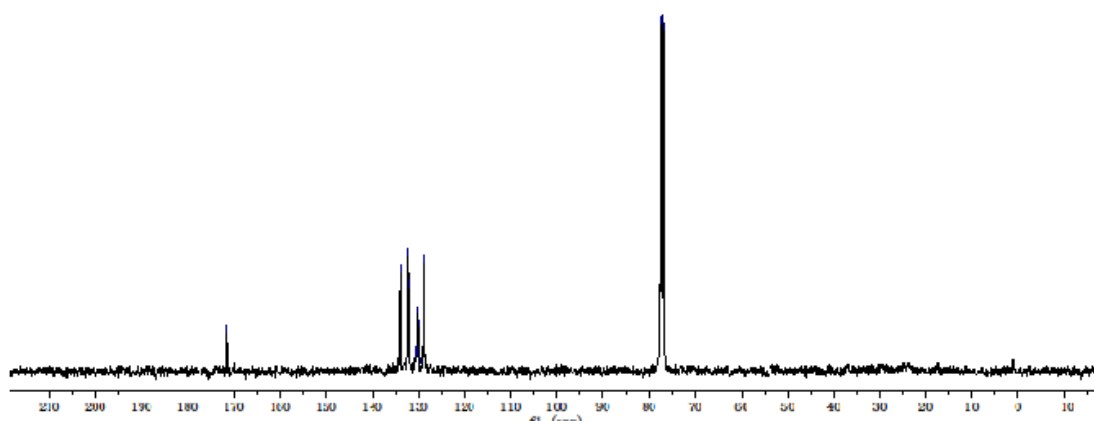

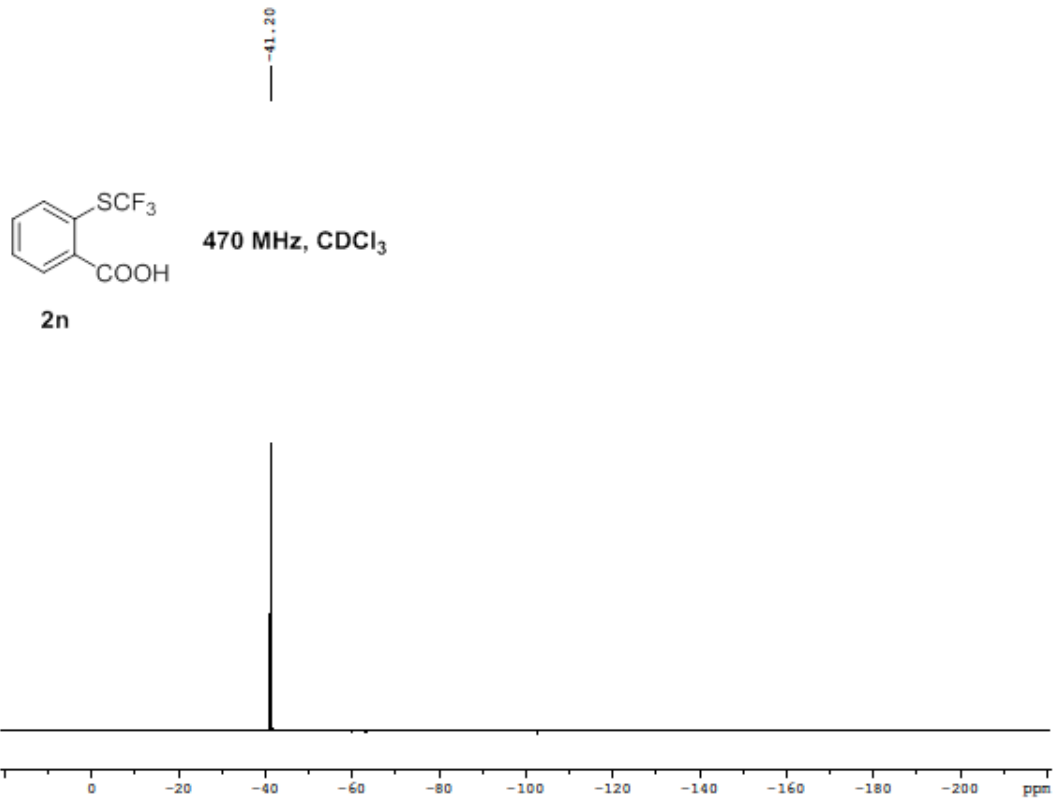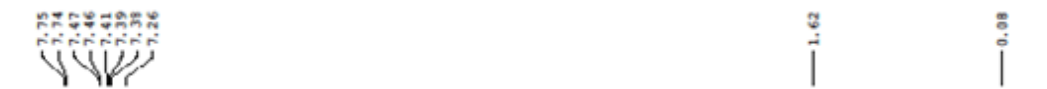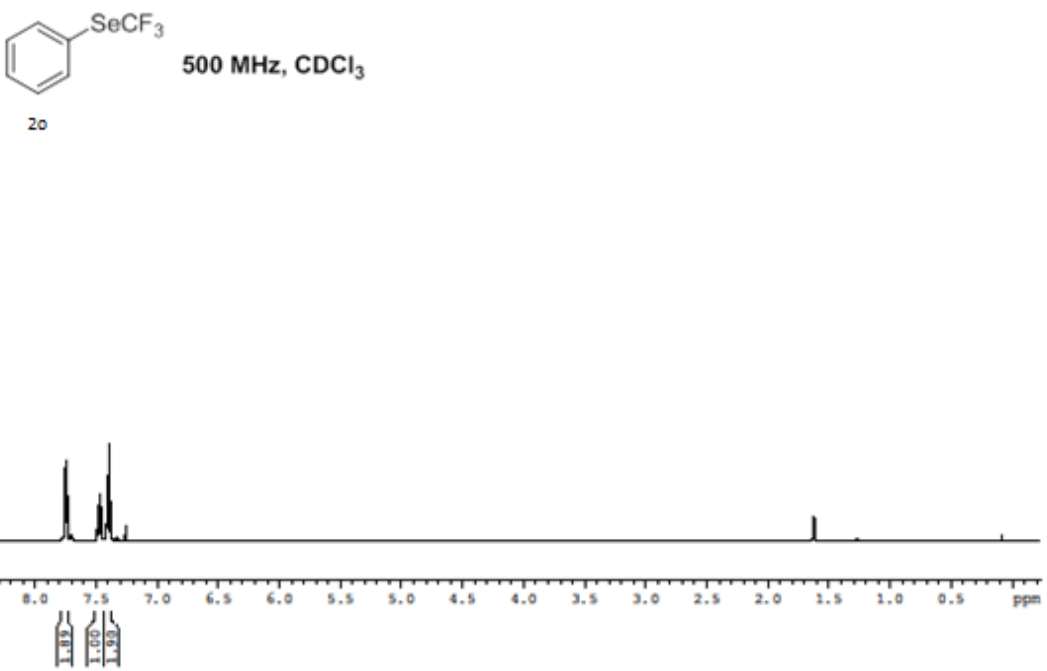

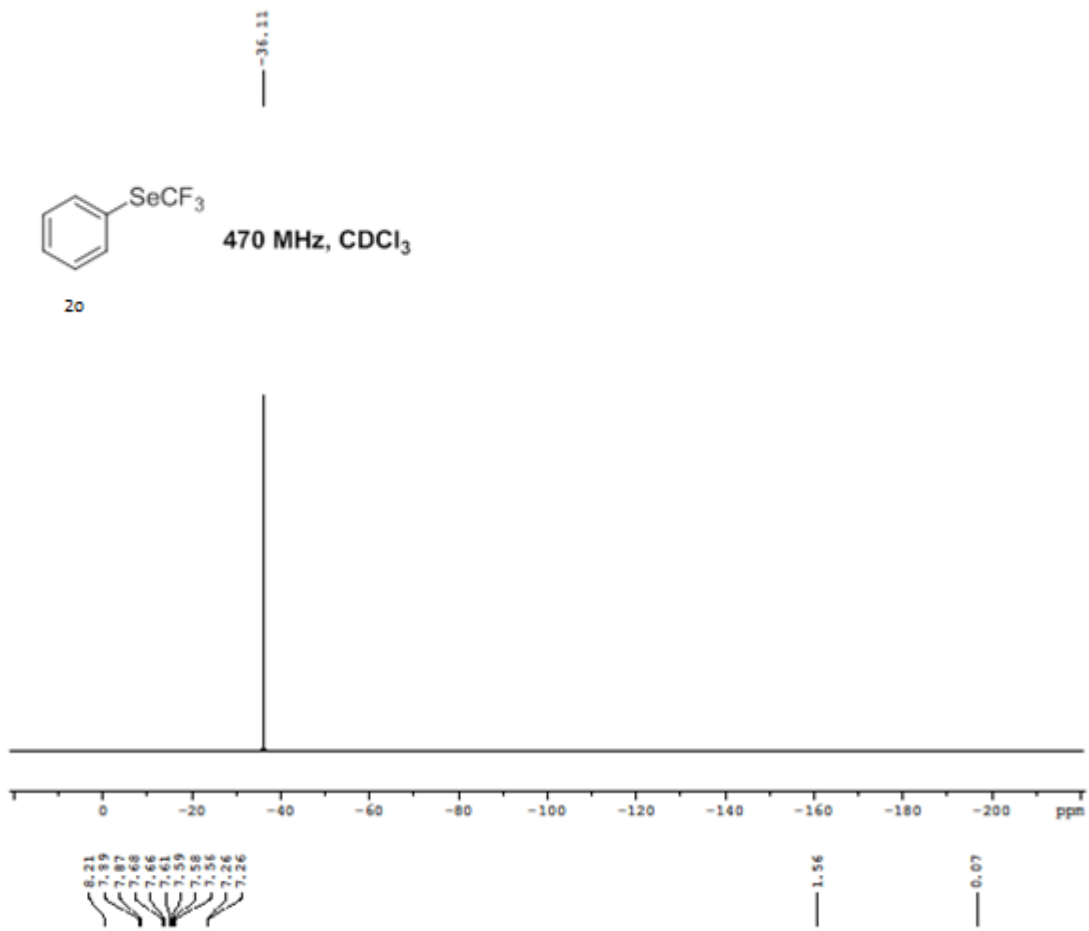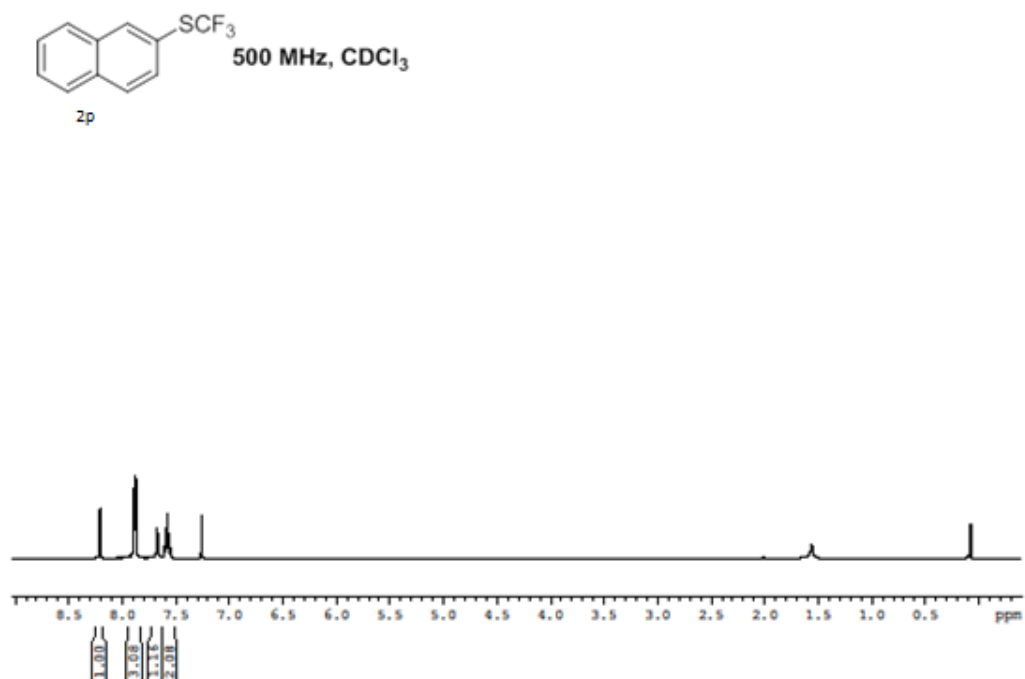

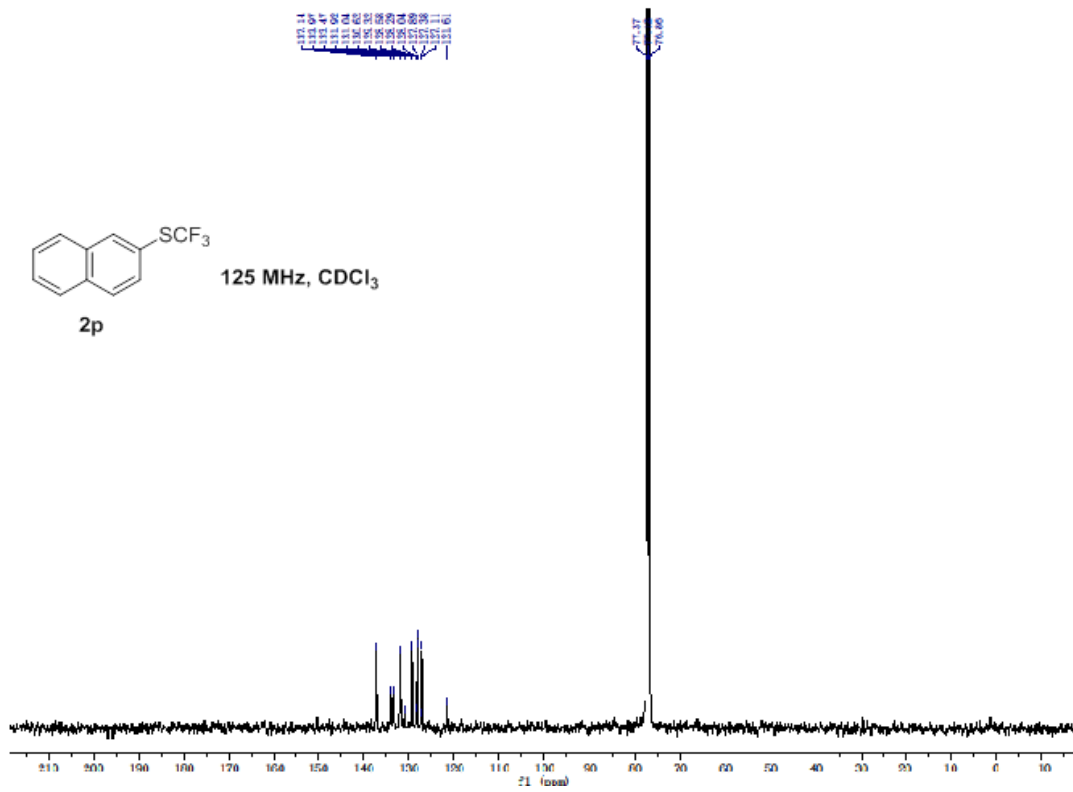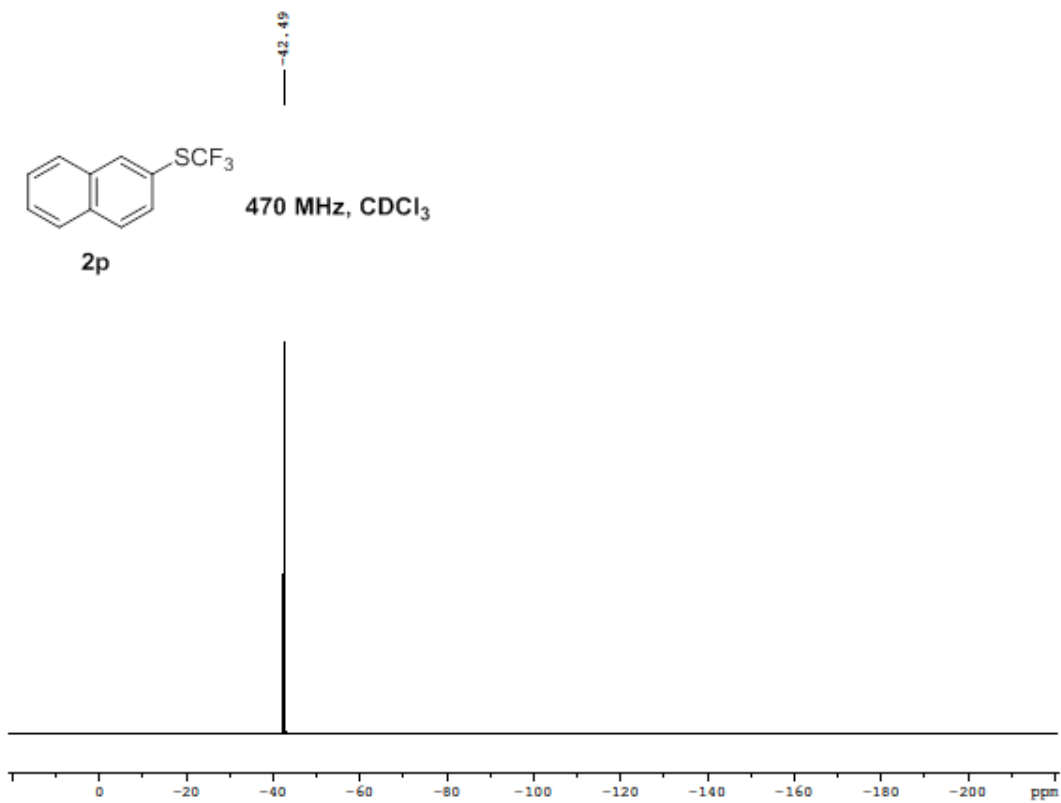

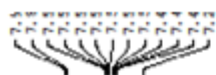

1.63

0.07

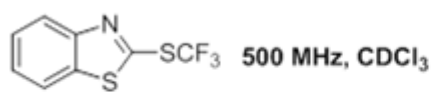

2q

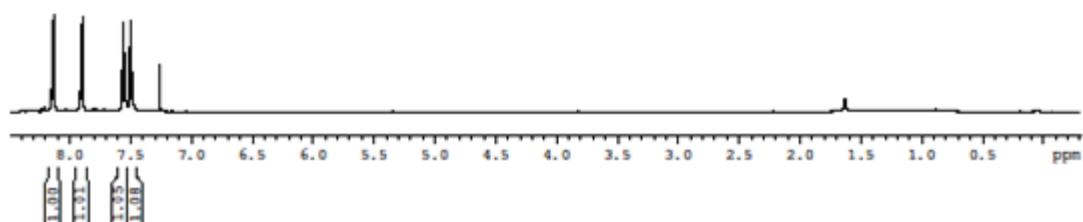

153.20  
 151.83  
 138.00  
 129.23  
 127.09  
 126.79  
 124.25  
 121.41

77.37  
 77.12  
 76.87

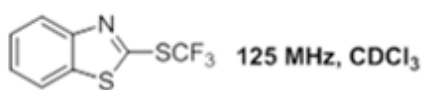

2q

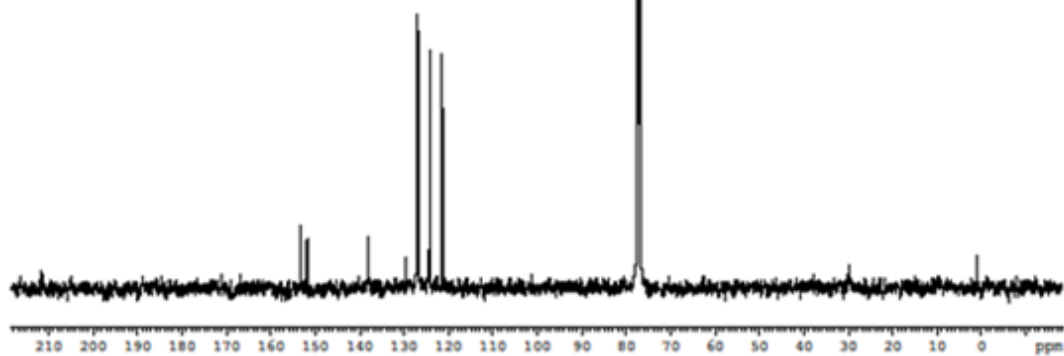

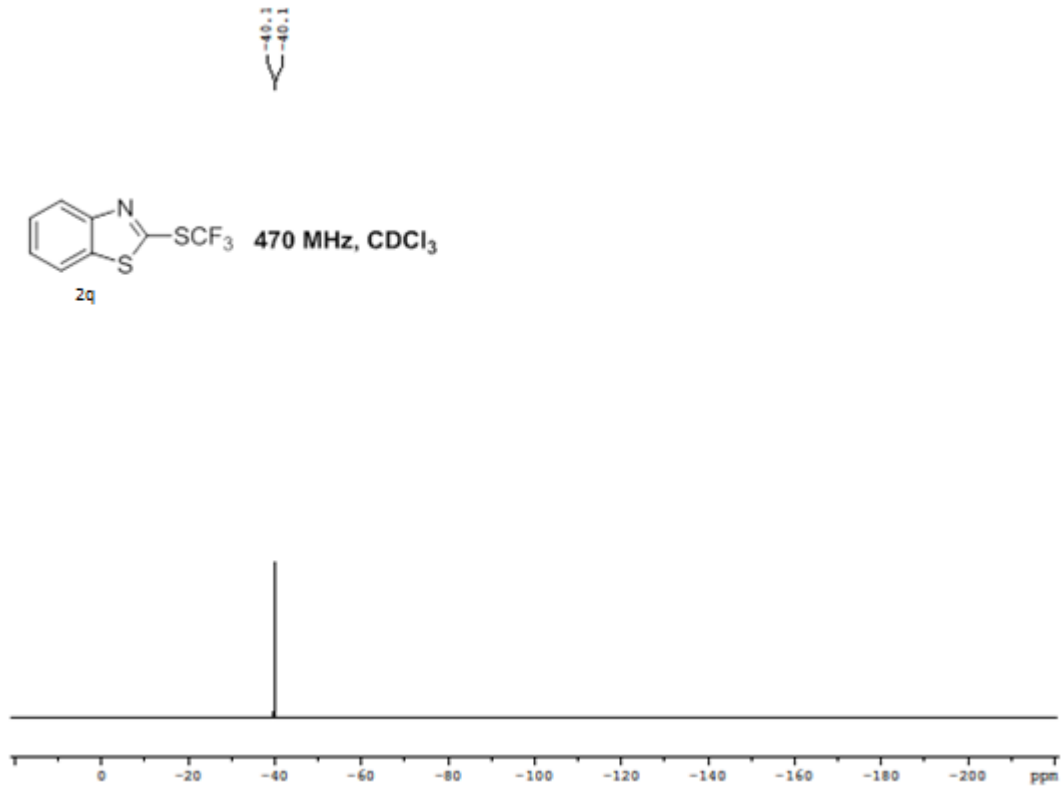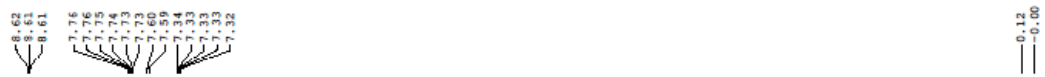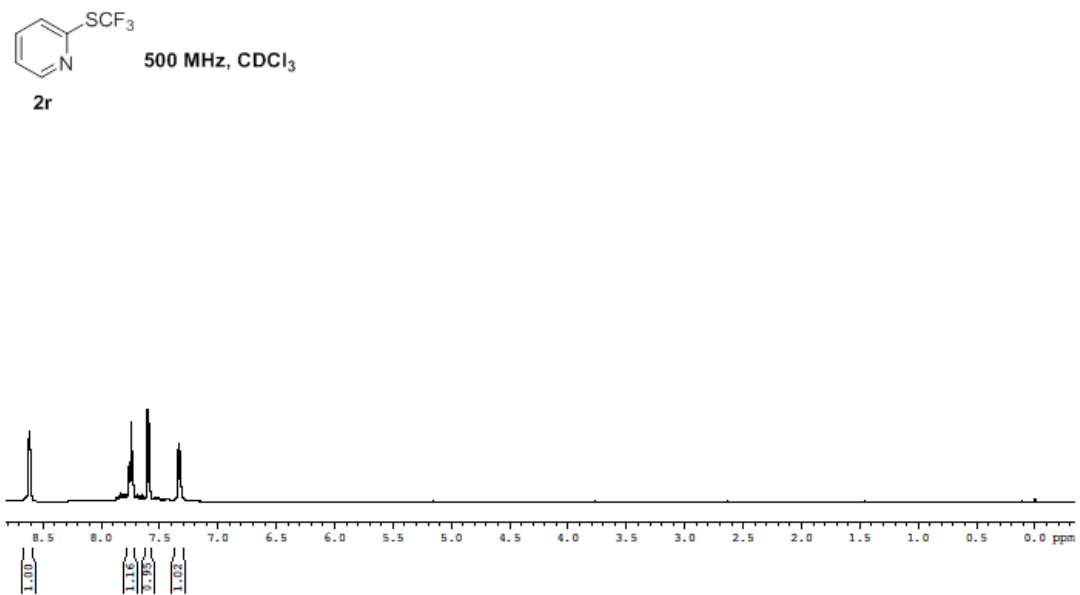

162.88  
152.88  
137.88  
132.88  
127.88  
122.88  
117.88  
112.88  
107.88  
102.88  
97.88  
92.88  
87.88  
82.88  
77.88  
72.88  
67.88  
62.88  
57.88  
52.88  
47.88  
42.88  
37.88  
32.88  
27.88  
22.88  
17.88  
12.88  
7.88  
2.88

77.46  
77.00  
76.54

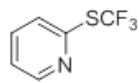

125 MHz, CDCl<sub>3</sub>

2r

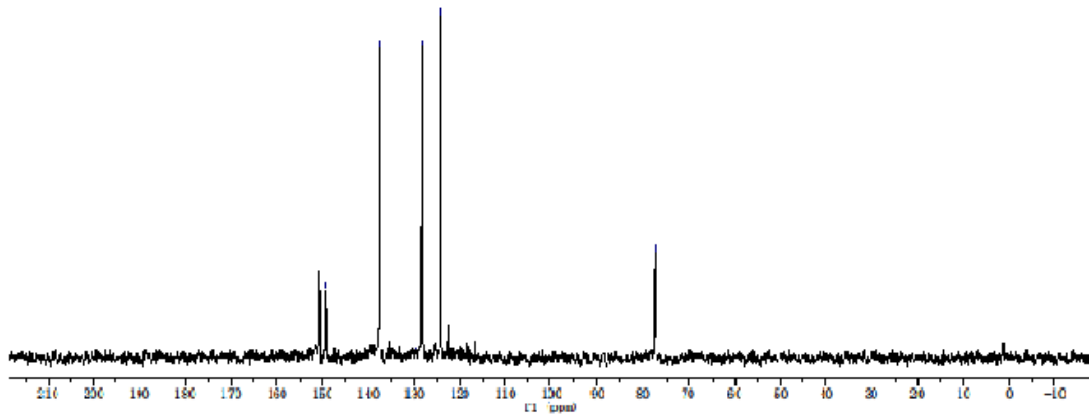

40.38

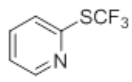

470 MHz, CDCl<sub>3</sub>

2r

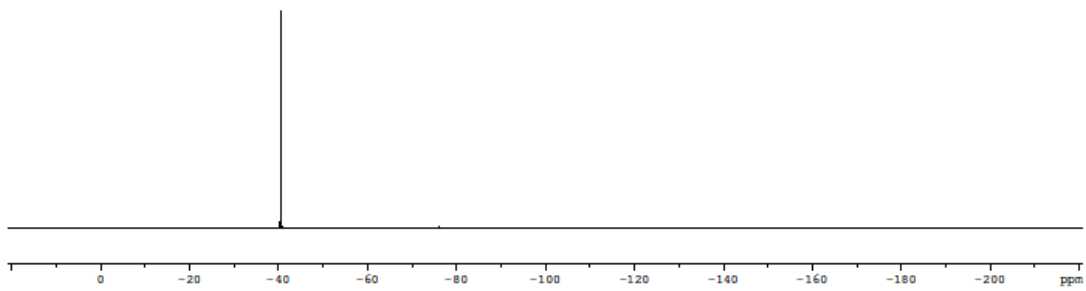

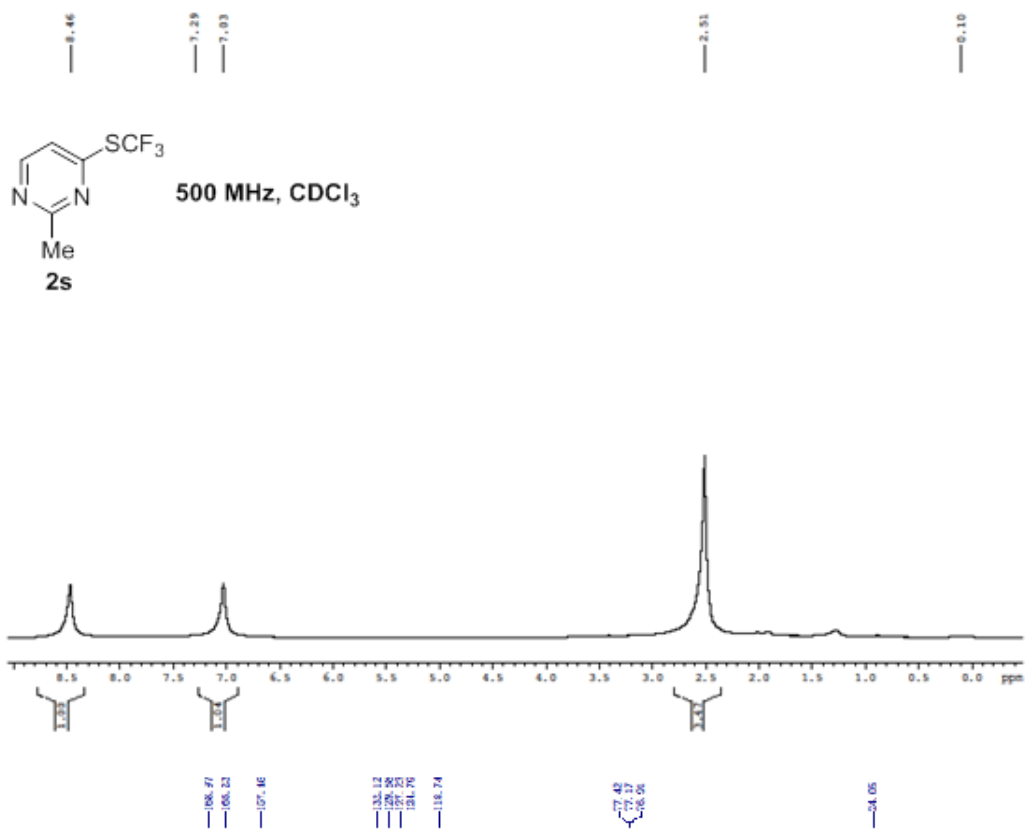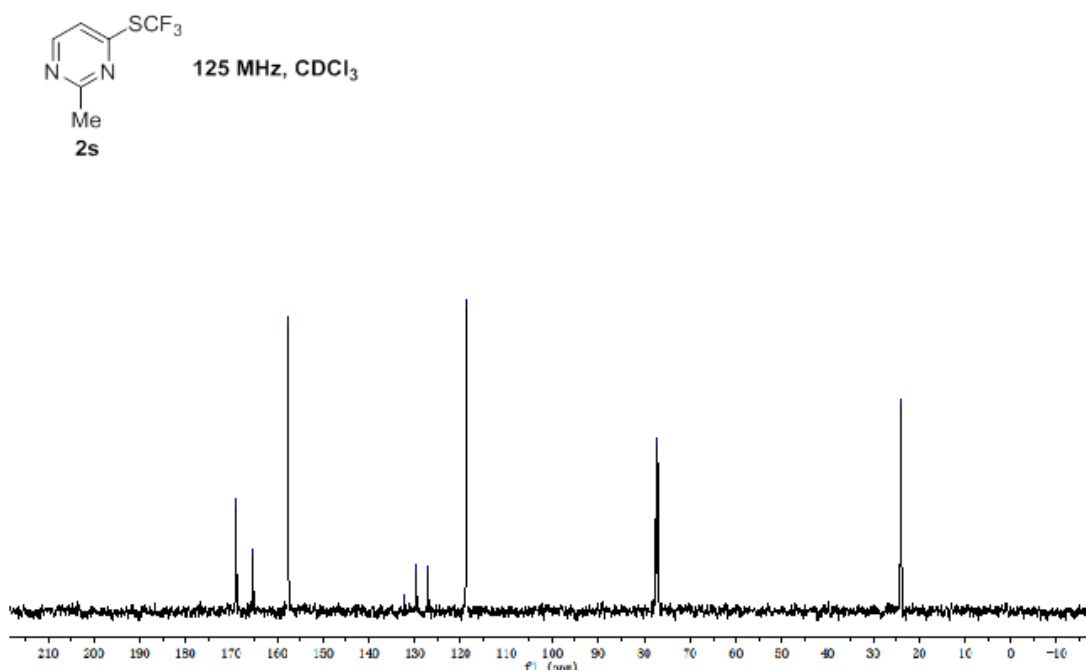



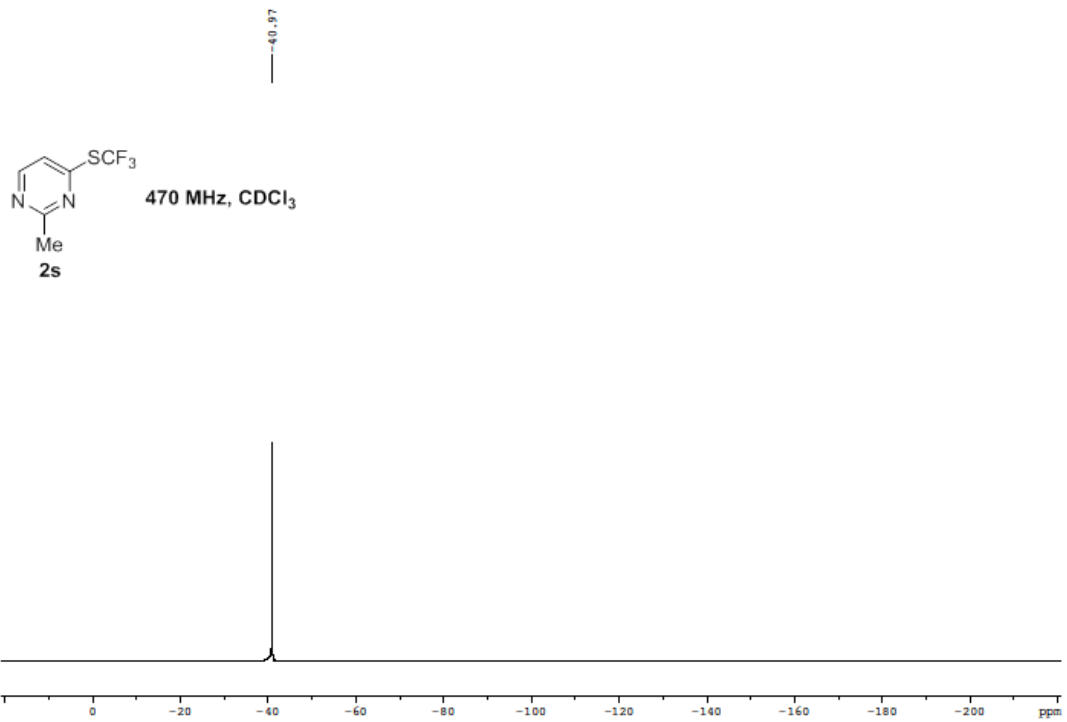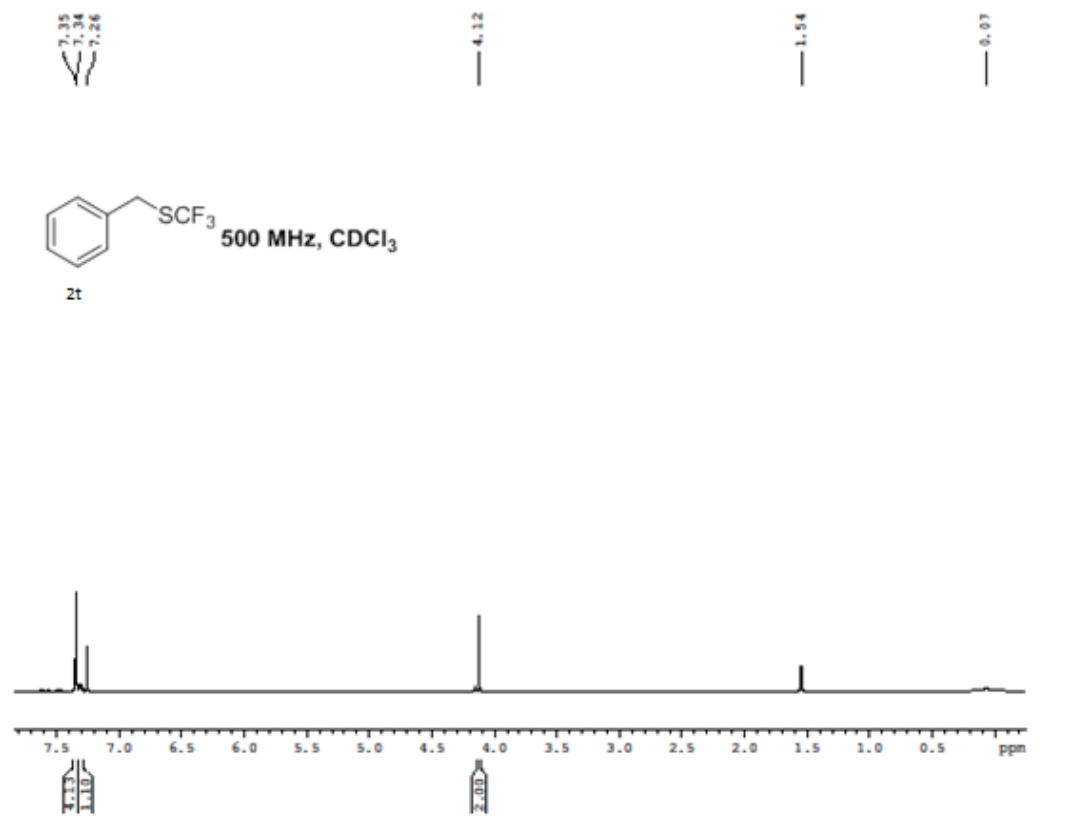

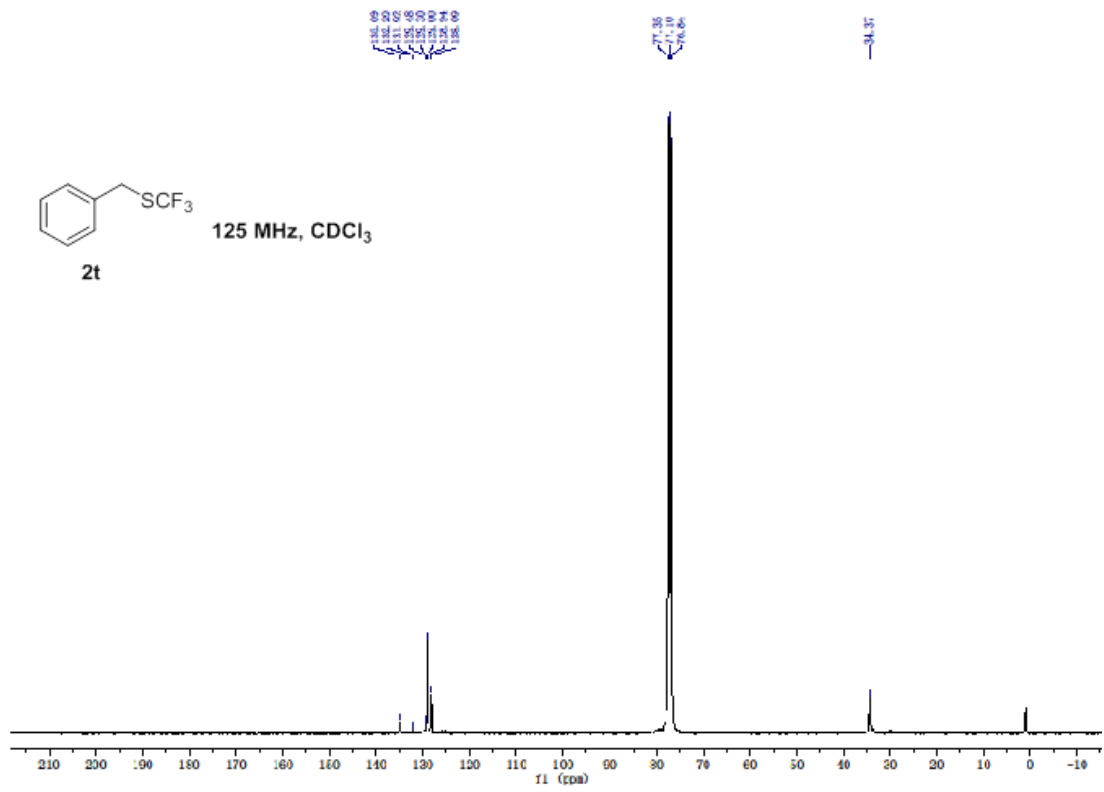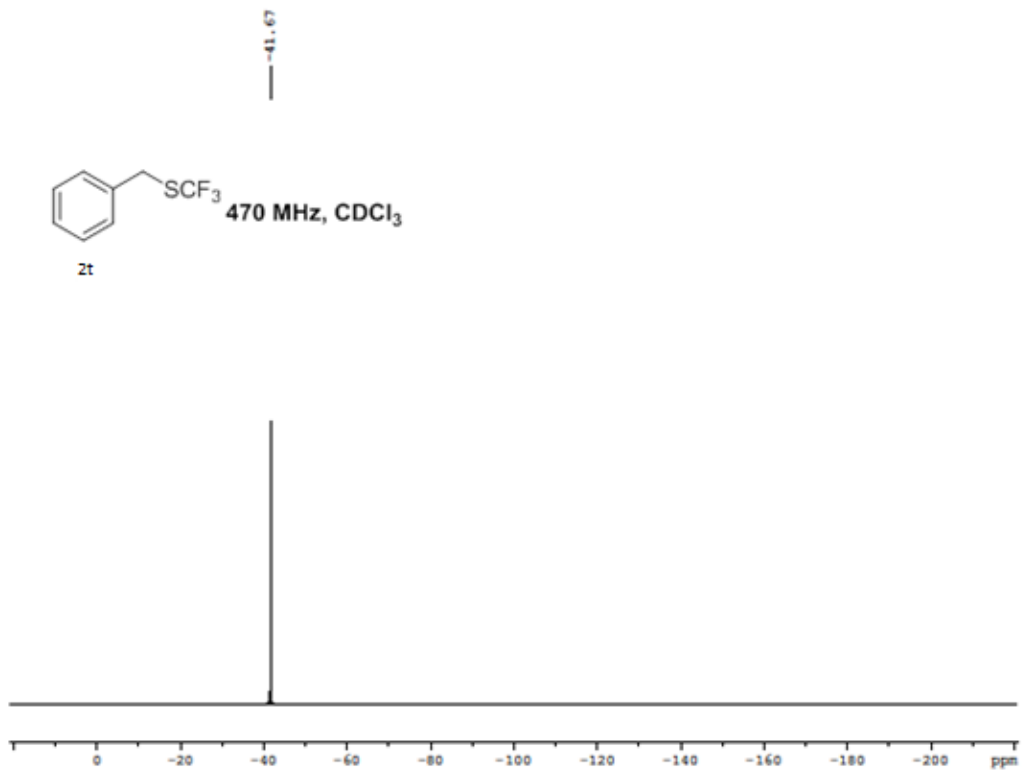

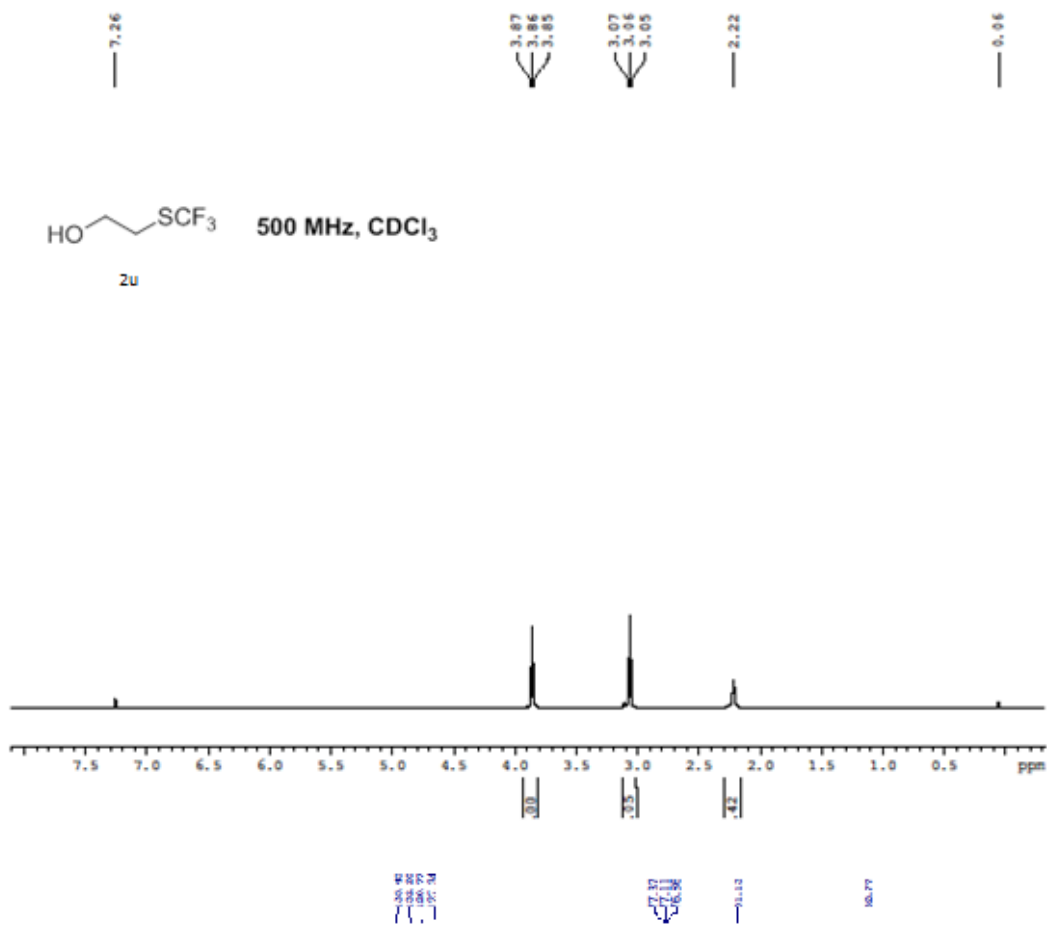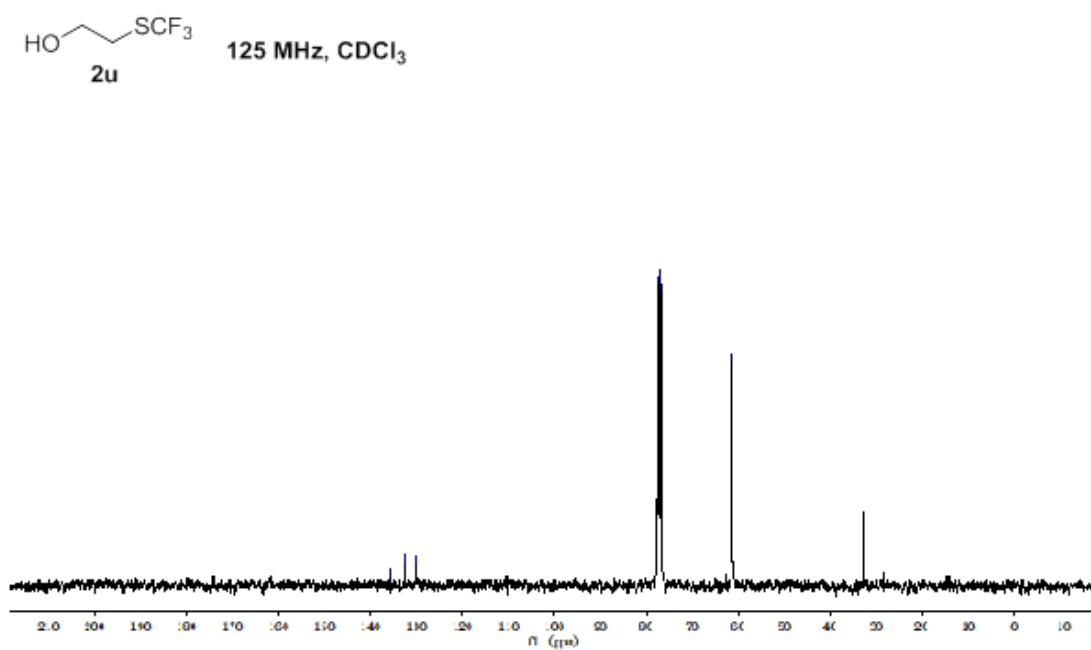

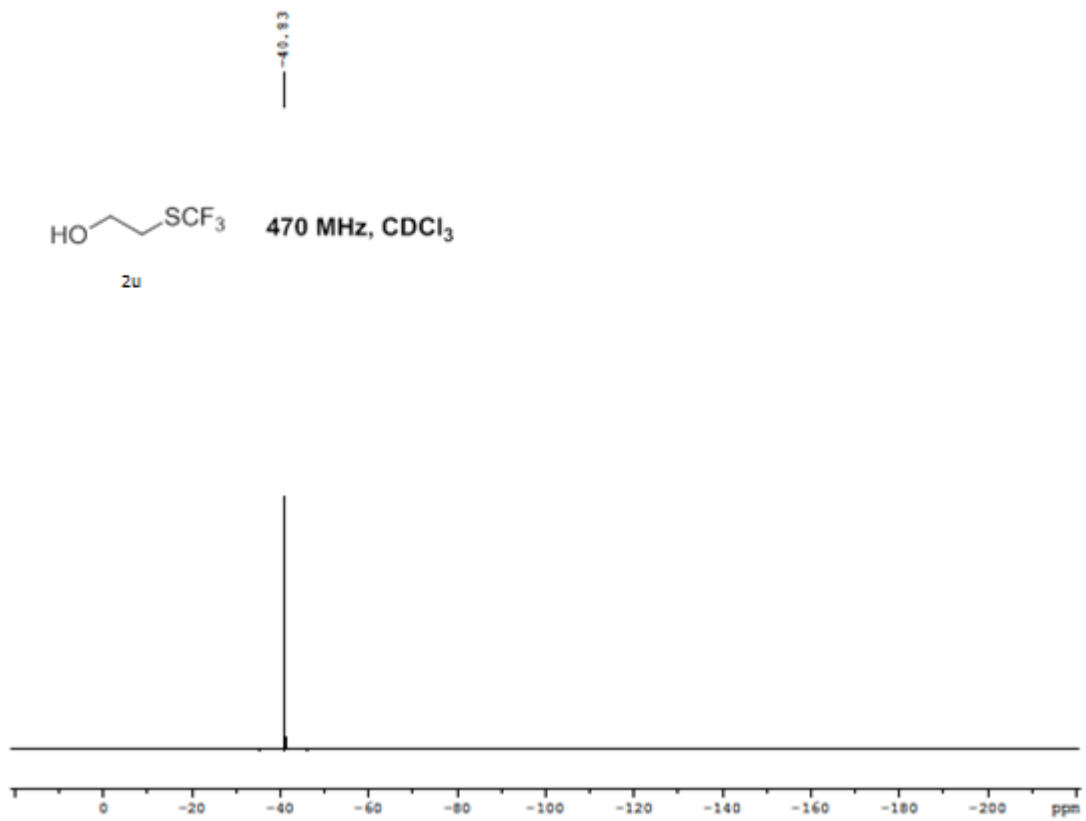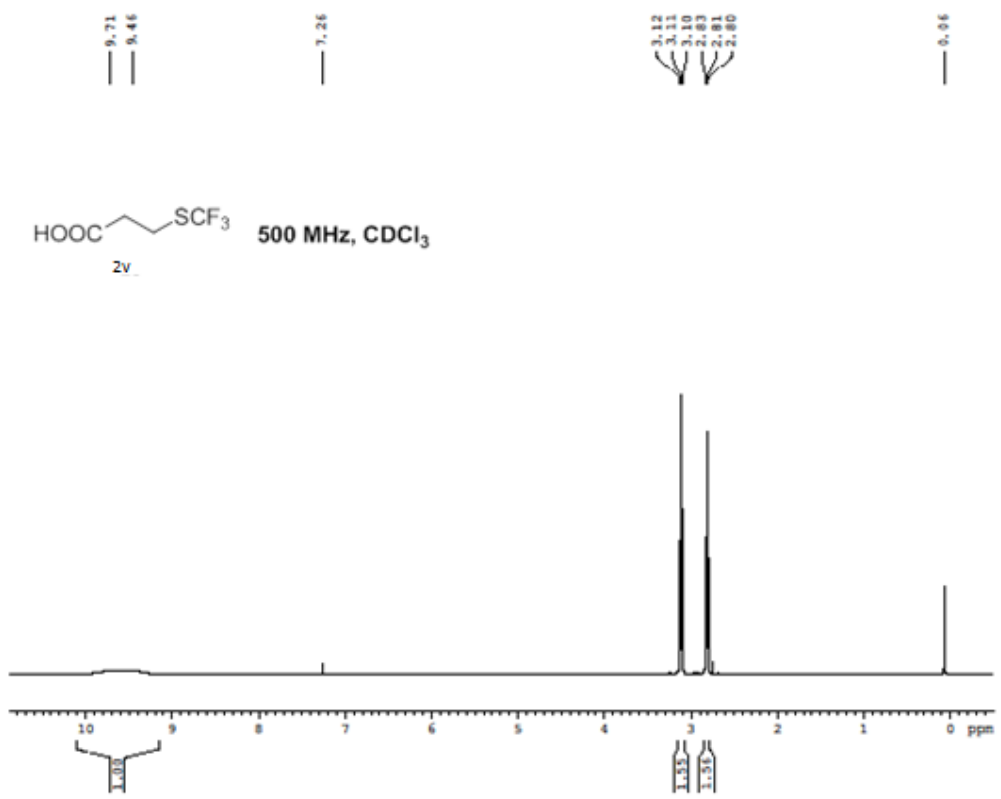

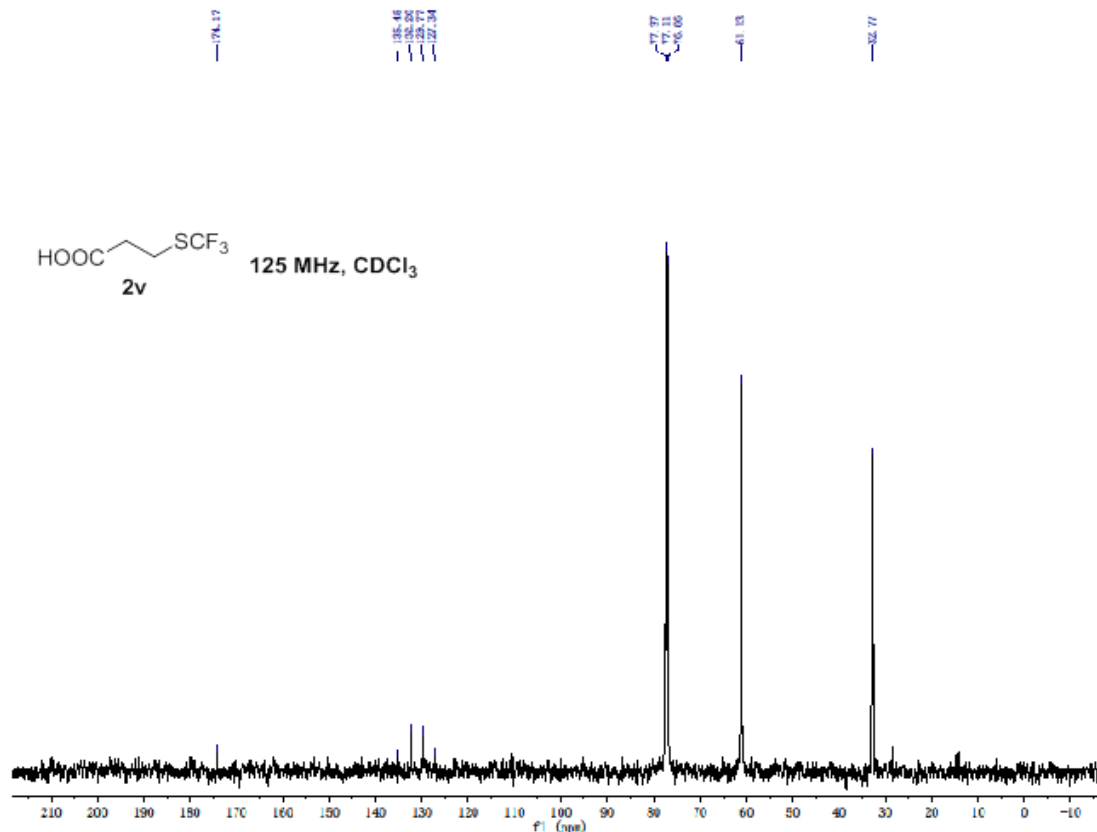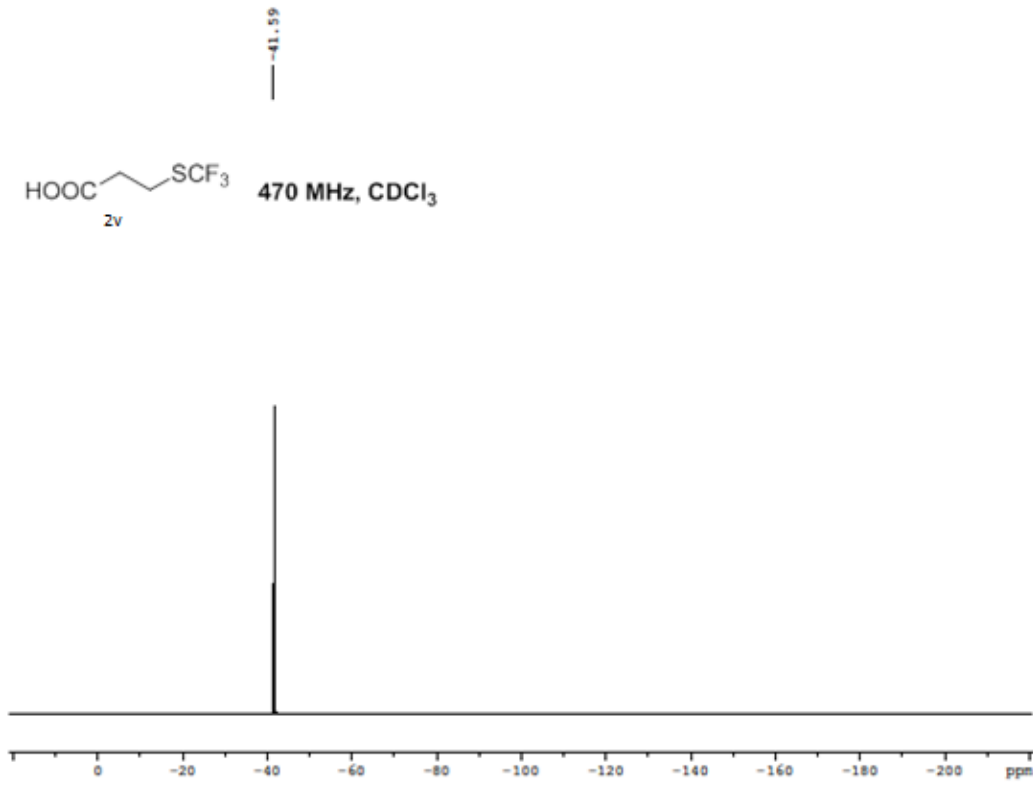

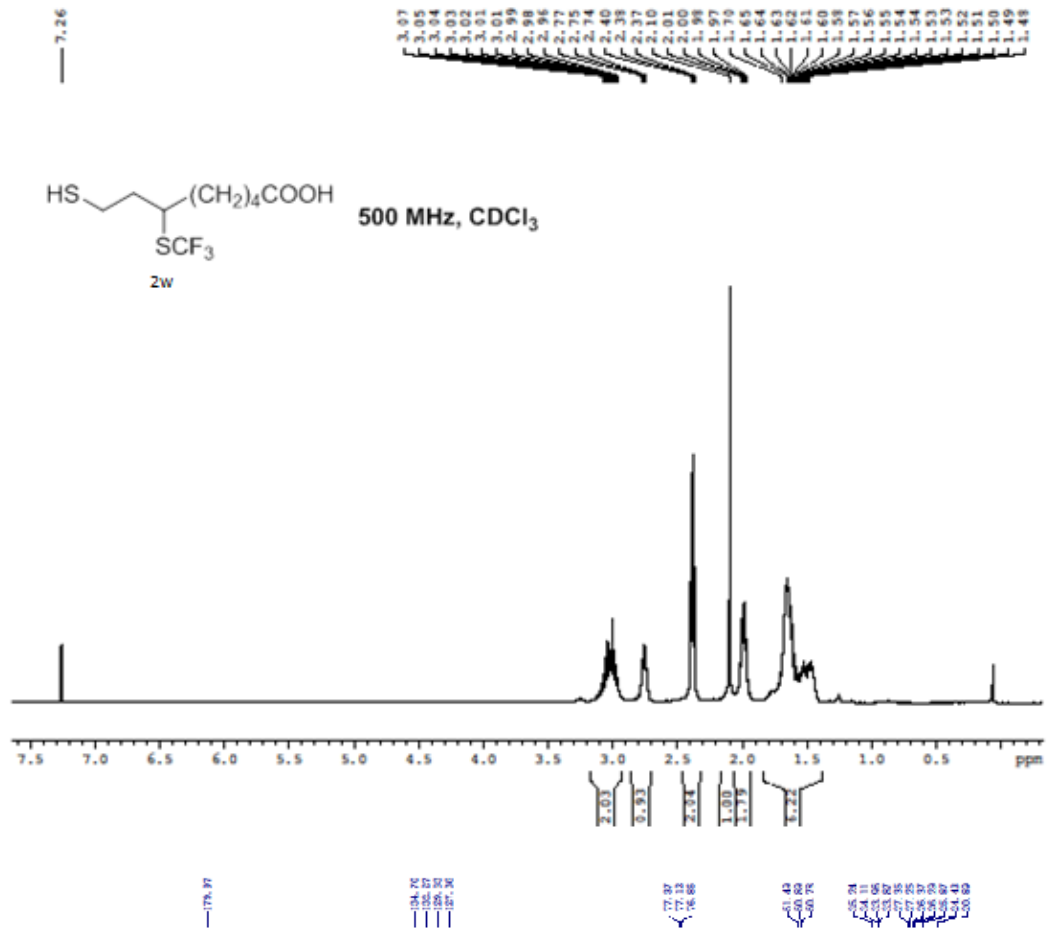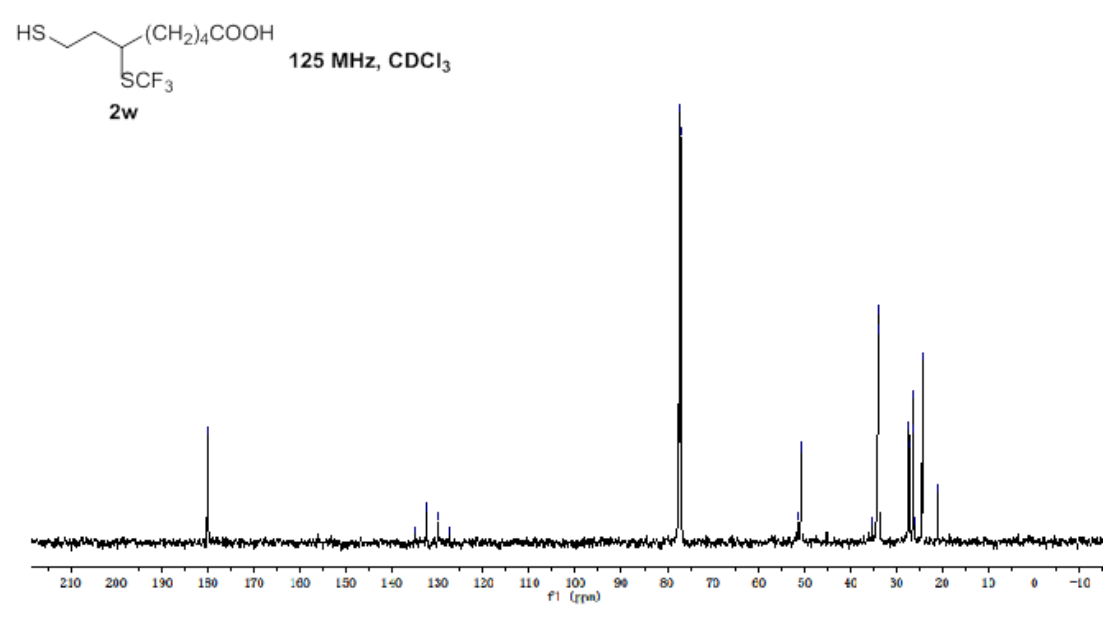

-40.9  
-40.9

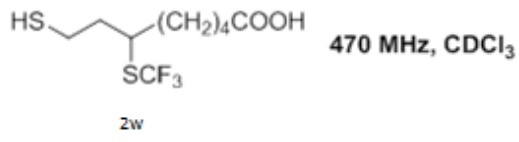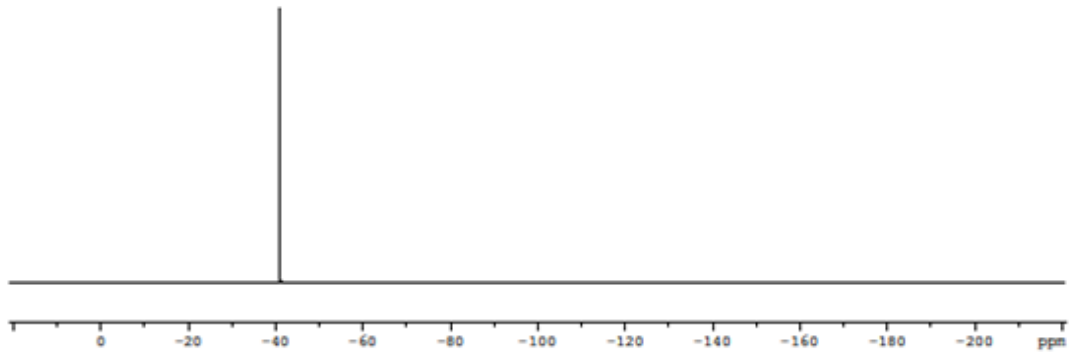

Supplement: c5cy01561h1.pdf [file c5cy01561h1.pdf]
